# Supplementary material
Source: ML conference proceedings conference paper supplement (https://openaccess.thecvf.com/content/CVPR2024/html/Manam_Leveraging_Camera_Triplets_CVPR_2024_paper.html)
Supplement: Supplementary file 1 [file Manam_Leveraging_Camera_Triplets_CVPR_2024_supplemental.pdf]

# Leveraging Camera Triplets for Efficient and Accurate Structure-from-Motion

## Supplementary Material

Lalit Manam and Venu Madhav Govindu

Indian Institute of Science

Bengaluru - 560012, INDIA

{lalitmanam, venu}@iisc.ac.in

### A. Proof for Theorem

In Sec. 3 of the main paper, we stated Thm. 1. We first rewrite the optimization problem and the thresholding scheme here for reference.

$$\max_{\substack{s_{ij} \in \{0,1\}, \\ (i,j) \in \mathcal{E}}} \frac{\sum_{(i,j) \in \mathcal{E}} s_{ij} q_{ij}}{\sum_{(i,j) \in \mathcal{E}} s_{ij}} - \lambda \frac{\sum_{(i,j) \in \mathcal{E}} (1 - s_{ij}) q_{ij}}{\sum_{(i,j) \in \mathcal{E}} (1 - s_{ij})}, \quad (\text{S1})$$

$$s_{ij} = \begin{cases} 1 & \text{if } q_{ij} \geq \tau, \\ 0 & \text{otherwise,} \end{cases} \quad (\text{S2})$$

where  $\lambda \geq 0$  is a regularization parameter and  $\tau$  denotes a threshold. Now, we provide the proof for Thm. 1.

**Theorem 1.** *For a given  $\lambda$  in Eqn. S1, there exists a threshold  $\tau$  such that the values of  $s_{ij}$  obtained by solving the problems given by Eqn. S1 and Eqn. S2 are the same.*

*Proof.* In Eqn. S1, the first term  $\frac{\sum_{(i,j) \in \mathcal{E}} s_{ij} q_{ij}}{\sum_{(i,j) \in \mathcal{E}} s_{ij}}$ , is the average score of the retained edges and the second term,  $\frac{\sum_{(i,j) \in \mathcal{E}} (1 - s_{ij}) q_{ij}}{\sum_{(i,j) \in \mathcal{E}} (1 - s_{ij})}$ , is the average score of the removed edges. We use the fact that given a set of numbers, removing numbers from the set less than their average or adding numbers to the set greater than their average increases the average of the final set.

The problem in Eqn. S1 is to maximize the function by improving the average score of the retained edges (first term) with the low average score of the removed edges (second term). This is achieved when the edges with top  $k$  scores are retained while others are removed. This is because it leads to the maximum possible increase in the first term and the minimum possible increase in the second term. Here,  $k$  is dependent on the value of  $\lambda$ . This is the same as thresholding the edges based on scores with  $sq_{k+1} < \tau \leq sq_k$ , where  $sq_z, z = \{1, 2, \dots, |\mathcal{E}|\}$  are the sorted scores  $q_{ij}$  in descending order. ■

### B. Additional Results

In Sec. 4 of the main paper, we provided reconstruction statistics and visual results on generic and ambiguous datasets. Here, we provide details of the datasets (for the largest connected component) along with additional results on them. We restate notations for the graphs below and introduce new notations which will be used further.

- $\mathcal{G}$ : Original viewgraph.
- $\mathcal{G}_{LCT}$ : Graph containing edges contributing to the largest connected component of the triplet graph  $\mathcal{G}_T$ .
- $\mathcal{G}_{Dopp}$ : Graph obtained after applying Doppelgangers [3] on the original graph  $\mathcal{G}$ .
- $\mathcal{G}_F(m)$ : Graph obtained after applying our method (Algo. 1) with minimum edge score  $m$ .
- $|\mathcal{V}_{sub}|$ : Number of nodes in the graph  $\mathcal{G}_{sub}$ , where  $sub$  is one of the subscripts of the graphs used above.
- $|\mathcal{E}_{sub}|$ : Number of edges in the graph  $\mathcal{G}_{sub}$ , where  $sub$  is one of the subscripts of the graphs used above.

#### B.1. Generic Datasets

In Sec. 4.1 of the main paper, we presented reconstruction results on generic datasets. Here, we provide details on different aspects in the subsequent paragraphs.

**Dataset details:** In Table S1, we show the number of nodes and edges present in the datasets after applying our method with different values of minimum edge score  $m = \{0.6, 0.7, 0.8, 0.9\}$ . It can be seen that, after sparsifying the graphs with our method, the number of edges is 10% to 30% of the original graphs ( $\mathcal{G}$ ). The reduction of edges in the sparsified graphs is similar when compared to the graphs consisting of triplets ( $\mathcal{G}_{LCT}$ ). Moreover, there is a steady decrease in the number of edges with an increase in  $m$ , but the number of nodes abruptly reduces for  $m = \{0.8, 0.9\}$ . This reveals that the original graphs are well connected, due to which removing edges with smaller values of  $m$  did not lead to a drastic reduction in the number of nodes. For higher values of  $m$ , the graphs

become sparse, leading to a substantial reduction in the number of nodes.

**Reconstruction details:** In Table S2, we show the reconstruction statistics of the graphs obtained with different values of  $m$  using COLMAP [36]. It can be seen that most of the cameras and 3D points are reconstructed with the filtered graphs ( $\mathcal{G}_F(m)$ ) compared to the original graph ( $\mathcal{G}$ ). Moreover, the number of 3D points reconstructed does not decrease drastically even if the number of nodes reconstructed reduces considerably for  $m = \{0.8, 0.9\}$ . This indicates that most parts of the reconstructions are still recovered even after the removal of many nodes. This shows the advantage of obtaining edge scores based on the connectivity of 3D points. We also observe that applying our method leads to better-quality reconstructions by avoiding ghost artifacts.

In Table S3, we provide the mean reprojection error for the reconstructed 3D points. It can be seen that reprojection errors reduce with an increase in  $m$ , revealing that the camera parameters (intrinsic and motion parameters) and 3D points are more consistent to the epipolar inliers in the sparsified graphs. We also compare the camera motions of different graphs, keeping the motions obtained from the original graphs as a reference. We only compare those datasets where ghost artifacts are not found in the original graphs. This ensures that the reference camera motions are reliable. It can be seen that the mean rotation difference is less than  $1^\circ$  for almost all the datasets. Also, the camera translations obtained from different graphs are close to the original graphs. This shows that the accuracy of the reconstructions is maintained after the sparsification of graphs.

**Time taken:** In Table S4, we show the reconstruction time taken by COLMAP [36] on sparsified graphs. It can be seen for all the datasets, reconstruction times reduce by a margin of 50% to 80% for the sparsified graphs, even for lower values of  $m$ , when compared to the original graphs.

In Table S5, we show the time taken for our method. We refer to preprocessing time as time taken for Steps 1-3 and filter time for Steps 4-11 in Algo. 1. It can be seen that for most of the datasets, our method takes less than 1% of the time taken for reconstruction (Table S4). The Rome dataset is very well connected, due to which the triplets are large in number, resulting in a longer computation time for our method.

**Visual results:** In Figs. S1, S2, S3, and S4, we provide visual results on generic datasets with varying values of the minimum edge score  $m$ . From Figs. S1, S2, and S3, it can

be seen that reconstructions obtained after sparsifying the graphs are visually similar to that of the original graphs even after losing some nodes with faster reconstruction times. Moreover, the main structure in the scenes is recovered for reconstructions of sparsified graphs even for a high value of  $m = 0.9$  for most datasets. This is a consequence of scoring edges based on 3D point connectivity. For Quad, the cameras are not well connected, due to which only a small part of the reconstruction of the original graph is recovered in the sparsified graph with  $m = 0.9$  ( $\mathcal{G}_F(0.9)$ ). In Fig. S4, we see that our method leads to improved reconstruction quality by avoiding ghost artifacts.

**Choosing minimum edge score:** Given the results shown above, we recommend setting the value of minimum edge score  $m$  between 0.6 and 0.7 for graph sparsification on generic datasets, keeping a trade-off between reconstruction quality and time.

## B.2. Ambiguous Datasets

In Sec. 4.2 of the main paper, we presented reconstruction results on ambiguous datasets. Here, we provide the results after applying our method for different values of minimum edge score  $m$ . For large-scale datasets, we show for  $m = \{0.6, 0.7, 0.8, 0.9\}$  and for medium and small-scale datasets, we show for  $m = \{0.3, 0.4, 0.5, 0.6\}$ . We also provide results from Doppelgangers [3], where we use probability threshold  $p = 0.8$  for all datasets except for Louvre [46], where we use  $p = 0.9$ . Doppelgangers [3] did not disambiguate some datasets for any probability threshold we checked and thus are marked as not disambiguated.

**Dataset details:** In Table S6, we show the number of nodes and edges present in the datasets after applying our method with different values of minimum edge score  $m$  and after Doppelgangers [3] on the original graph. In these datasets, our method not only removes false edges but also sparsifies the graphs. Similar to the observation for generic datasets, here as well, there is a steady decrease in the number of edges with increasing  $m$ , but the number of nodes abruptly decreases for  $m = \{0.8, 0.9\}$ . This shows that original graphs are well connected, due to which smaller values of  $m$  lead to the removal of a few nodes. For larger values of  $m$ , the graph becomes sparser, leading to more nodes being lost. We also observe that the number of edges after applying our method is lesser compared to Doppelgangers [3] for most datasets due to the sparsification behaviour of our method. The number of nodes retained by our method is larger than that of Doppelgangers [3] for large-scale datasets [46, 47], similar for medium-scale [17], and lesser for small-scale datasets [49]. For small-scale datasets [49], the redundancy of edges in the graphs is low, which causes many nodes to be lost.

**Performance comparison:** In Table S7, we provide a comparison of our method with other disambiguation methods [17, 46, 6, 49, 3] by following the experimental procedure in [3]. It can be seen that COLMAP [36] fails to disambiguate on all datasets except Louvre [46] and Temple of Heaven [49]. Other methods are able to disambiguate many datasets with our method performing the best. Our method disambiguates all datasets except Cup [49]. For small-scale datasets [49], our method tends to over-split the reconstructions. As discussed in Sec. 4.2 of the main paper, the datasets from [49] have low edge redundancy, due to which the sparsification behaviour of our method leads to reconstruction over-splits.

**Reconstruction details:** In Table S8, we provide the reconstruction statistics on ambiguous datasets. It can be seen that large-scale datasets [46, 47] are disambiguated using  $m = 0.6$  (which is also recommended for graph sparsification), except for highly ambiguous datasets, Louvre [46] and Sacre Coeur [46], where higher values of  $m$  are required. Usage of high values of  $m$  is not recommended in general since it removes most of the edges, thus failing to reconstruct, as seen for Seville [46] and Yorkminster [47] for  $m = 0.9$ . For medium [17] and small-scale [49] datasets,  $m = 0.3$  disambiguates all datasets except Cup, which is disambiguated with  $m = \{0.5, 0.6\}$ . It can also be seen that the number of cameras and 3D points recovered are similar for our method and Doppelgangers [3] for large [46, 47] and medium-scale [17] datasets, even though our method sparsifies the graphs.

In Table S9, we provide the mean reprojection error for the reconstructed 3D points, which reduces with increase in  $m$ . This shows that, for ambiguous datasets as well, the camera and 3D points reconstructed are more consistent with that of the epipolar inliers with an increase in  $m$ . We also compare the camera motions of different graphs to that of the Doppelgangers [3] graph. We only compare camera motions for the datasets which have been disambiguated by Doppelgangers [3] to ensure only correctly estimated cameras are used as a reference for comparison. It can be seen that for the cases when our method disambiguates repeated structures, camera motions are close to the one obtained from Doppelgangers [3]. For Seville [46] and Yorkminster [47], no reconstruction was obtained from COLMAP [36] for  $\mathcal{G}_F(0.9)$  since most of the cameras and edges were lost in the largest connected component. For Street [49] and Radcliffe Camera [17], some reconstructions did not have common cameras with Doppelgangers [3] reconstructions since different facades of the buildings were reconstructed.

**Time taken:** In Table S10, we compare the recon-

struction time taken by COLMAP [36]. It can be seen that reconstruction time after disambiguation reduces for all datasets for both Doppelgangers [3] and our method with significant reduction for large-scale datasets. Moreover, since our method also sparsifies the graphs, the reconstruction time for our method is less compared to Doppelgangers [3].

In Table S11, we compare the processing time for different disambiguation methods. Similar to the previous subsection, we refer to the preprocessing time for our method as the time taken for Steps 1-3 and filter time for Steps 4-11 in Algo. 1. For Doppelgangers [3], preprocessing involves extracting specific keypoint descriptors and matches based on which their neural network is trained, and filtering refers to inferencing on all the edges using the neural network. For other methods, preprocessing time involves time required for giving specific inputs to their algorithms. It can be seen that our method is the fastest among other methods, taking less than 0.1% of the reconstruction time taken by COLMAP (Table S10) for large [46, 47] and medium-scale [17] datasets and less than 10% for small scale [49] datasets. Moreover, our method takes significantly less time to filter due to vectorized and parallelized operations. Our overall time taken, including preprocessing time, is significantly less than Doppelgangers [3] since our method scores the edges independent of keypoint descriptors and thus does not require extraction of specific keypoint descriptors.

**Visual results:** In Figs. S5, S6, S7, S8, S9, and S10, we provide visual results on the ambiguous datasets. Since both original ( $\mathcal{G}$ ) and triplet ( $\mathcal{G}_{LCT}$ ) graphs are not disambiguated, we show results only for  $\mathcal{G}_{LCT}$  to fit all comparisons for a given dataset in a single page. It can be seen that for large-scale datasets, our method is able to disambiguate and recover most parts of the reconstructions with faster reconstruction times. Since our method does both disambiguation and graph sparsification, in some cases, removing true edges leads to superimposed reconstructions, as seen in Ellis Island [47] ( $\mathcal{G}_F(0.7)$ ) and Louvre [46] ( $\mathcal{G}_F(0.6)$  and  $\mathcal{G}_F(0.7)$ ). However, these are corrected after further increasing the minimum edge score.

**Choosing minimum edge score:** Given the results on ambiguous datasets, we recommend setting the minimum edge score  $m$  between 0.6 and 0.7 for large-scale datasets and between 0.3 and 0.4 for medium and small-scale datasets to keep a trade-off between getting a proper reconstruction and time taken for reconstruction. The minimum edge score should only be increased for highly ambiguous datasets to avoid superimposed reconstructions in such datasets.

| Dataset                  | Number of Nodes |                       |                        |                        |                        |                        | Number of Edges |                       |                        |                        |                        |                        |
|--------------------------|-----------------|-----------------------|------------------------|------------------------|------------------------|------------------------|-----------------|-----------------------|------------------------|------------------------|------------------------|------------------------|
|                          | $ \mathcal{V} $ | $ \mathcal{V}_{LCT} $ | $ \mathcal{V}_F(0.6) $ | $ \mathcal{V}_F(0.7) $ | $ \mathcal{V}_F(0.8) $ | $ \mathcal{V}_F(0.9) $ | $ \mathcal{E} $ | $ \mathcal{E}_{LCT} $ | $ \mathcal{E}_F(0.6) $ | $ \mathcal{E}_F(0.7) $ | $ \mathcal{E}_F(0.8) $ | $ \mathcal{E}_F(0.9) $ |
| Alamo [47]               | 1700            | 1124                  | 777                    | 722                    | 617                    | 386                    | 31986           | 29964                 | 7966                   | 5750                   | 3758                   | 1563                   |
| Gendarmenmarkt [47]      | 1241            | 1143                  | 1063                   | 1016                   | 948                    | 753                    | 35819           | 35510                 | 8885                   | 6649                   | 4469                   | 2161                   |
| Madrid Metropolis [47]   | 1012            | 759                   | 639                    | 540                    | 438                    | 172                    | 14997           | 14372                 | 3633                   | 2686                   | 1733                   | 433                    |
| Montreal Notre Dame [47] | 1815            | 612                   | 549                    | 521                    | 404                    | 352                    | 46466           | 25480                 | 5547                   | 4228                   | 2586                   | 1340                   |
| NYC Library [47]         | 1926            | 869                   | 676                    | 590                    | 545                    | 369                    | 23399           | 14455                 | 4750                   | 3509                   | 2351                   | 1060                   |
| Notre Dame [47]          | 1430            | 1430                  | 1328                   | 1270                   | 1134                   | 660                    | 91907           | 91907                 | 22200                  | 15875                  | 10018                  | 3883                   |
| Piccadilly [47]          | 5087            | 3670                  | 3431                   | 3308                   | 3106                   | 2633                   | 111238          | 105868                | 37754                  | 27477                  | 17568                  | 8347                   |
| Roman Forum [47]         | 1960            | 1669                  | 1555                   | 1495                   | 1357                   | 1132                   | 36023           | 34710                 | 13038                  | 9511                   | 6119                   | 3084                   |
| Tower of London [47]     | 1165            | 900                   | 739                    | 659                    | 500                    | 307                    | 15886           | 15352                 | 4936                   | 3510                   | 2197                   | 914                    |
| Trafalgar [47]           | 11606           | 9146                  | 8423                   | 8110                   | 7632                   | 6451                   | 238983          | 229930                | 96257                  | 71029                  | 46108                  | 21413                  |
| Union Square [47]        | 3015            | 1804                  | 1593                   | 1335                   | 1186                   | 880                    | 36718           | 34037                 | 12537                  | 7366                   | 4761                   | 2307                   |
| Vienna Cathedral [47]    | 4151            | 2042                  | 1592                   | 1483                   | 1089                   | 892                    | 70674           | 54435                 | 21473                  | 16013                  | 7921                   | 3913                   |
| Dubrovnik [24]           | 6039            | 6001                  | 5900                   | 5830                   | 5515                   | 4865                   | 167489          | 167009                | 72981                  | 53740                  | 34806                  | 17156                  |
| Rome [24]                | 14537           | 11333                 | 10688                  | 10515                  | 8904                   | 7849                   | 697172          | 579978                | 285592                 | 210828                 | 121487                 | 57543                  |
| Quad [5]                 | 6330            | 5977                  | 5461                   | 5136                   | 4050                   | 1678                   | 105990          | 104310                | 35083                  | 25773                  | 16452                  | 3786                   |

Table S1. Dataset details of **generic** datasets. A steady decrease in the number of edges is observed with increasing minimum edge score  $m$  but not on the number of nodes.

| Dataset                  | Clean Reconstruction |                     |                      |                      |                      |                      | # Cameras Reconstructed ( $\#N_{CR}$ ) |                     |                      |                      |                      |                      | # 3D Points Reconstructed (in $10^3$ ) |                     |                      |                      |                      |                      |
|--------------------------|----------------------|---------------------|----------------------|----------------------|----------------------|----------------------|----------------------------------------|---------------------|----------------------|----------------------|----------------------|----------------------|----------------------------------------|---------------------|----------------------|----------------------|----------------------|----------------------|
|                          | $\mathcal{G}$        | $\mathcal{G}_{LCT}$ | $\mathcal{G}_F(0.6)$ | $\mathcal{G}_F(0.7)$ | $\mathcal{G}_F(0.8)$ | $\mathcal{G}_F(0.9)$ | $\mathcal{G}$                          | $\mathcal{G}_{LCT}$ | $\mathcal{G}_F(0.6)$ | $\mathcal{G}_F(0.7)$ | $\mathcal{G}_F(0.8)$ | $\mathcal{G}_F(0.9)$ | $\mathcal{G}$                          | $\mathcal{G}_{LCT}$ | $\mathcal{G}_F(0.6)$ | $\mathcal{G}_F(0.7)$ | $\mathcal{G}_F(0.8)$ | $\mathcal{G}_F(0.9)$ |
| Alamo [47]               | ✓                    | ✓                   | ✓                    | ✓                    | ✓                    | ✓                    | 899                                    | 875                 | 652                  | 612                  | 543                  | 341                  | 161                                    | 157                 | 128                  | 126                  | 121                  | 78                   |
| Gendarmenmarkt [47]      | ✗                    | ✗                   | ✓                    | ✓                    | ✓                    | ✓                    | 1042                                   | 1045                | 899                  | 857                  | 794                  | 654                  | 207                                    | 206                 | 160                  | 151                  | 135                  | 108                  |
| Madrid Metropolis [47]   | ✓                    | ✓                   | ✓                    | ✓                    | ✓                    | ✓                    | 471                                    | 453                 | 274                  | 232                  | 229                  | 141                  | 74                                     | 72                  | 47                   | 33                   | 34                   | 21                   |
| Montreal Notre Dame [47] | ✓                    | ✓                   | ✓                    | ✓                    | ✓                    | ✓                    | 575                                    | 570                 | 411                  | 398                  | 389                  | 340                  | 145                                    | 146                 | 108                  | 103                  | 96                   | 84                   |
| Notre Dame [47]          | ✗                    | ✗                   | ✓                    | ✓                    | ✓                    | ✓                    | 1407                                   | 1406                | 1295                 | 1093                 | 987                  | 659                  | 348                                    | 348                 | 332                  | 288                  | 277                  | 227                  |
| NYC Library [47]         | ✓                    | ✓                   | ✓                    | ✓                    | ✓                    | ✓                    | 635                                    | 614                 | 509                  | 396                  | 399                  | 299                  | 110                                    | 109                 | 93                   | 84                   | 77                   | 57                   |
| Piccadilly [47]          | ✗                    | ✗                   | ✓                    | ✓                    | ✓                    | ✓                    | 3208                                   | 3110                | 2786                 | 2645                 | 2466                 | 2037                 | 374                                    | 368                 | 311                  | 288                  | 255                  | 202                  |
| Roman Forum [47]         | ✓                    | ✓                   | ✓                    | ✓                    | ✓                    | ✓                    | 1587                                   | 1565                | 1365                 | 1295                 | 1195                 | 680                  | 324                                    | 323                 | 278                  | 263                  | 240                  | 132                  |
| Tower of London [47]     | ✓                    | ✓                   | ✓                    | ✓                    | ✓                    | ✓                    | 735                                    | 718                 | 535                  | 495                  | 428                  | 279                  | 165                                    | 165                 | 137                  | 129                  | 110                  | 84                   |
| Trafalgar [47]           | ✓                    | ✓                   | ✓                    | ✓                    | ✓                    | ✓                    | 7867                                   | 7532                | 6538                 | 6256                 | 5783                 | 4602                 | 706                                    | 695                 | 573                  | 545                  | 491                  | 397                  |
| Union Square [47]        | ✓                    | ✓                   | ✓                    | ✓                    | ✓                    | ✓                    | 1160                                   | 1150                | 891                  | 805                  | 737                  | 366                  | 82                                     | 81                  | 62                   | 55                   | 49                   | 24                   |
| Vienna Cathedral [47]    | ✗                    | ✗                   | ✓                    | ✓                    | ✓                    | ✓                    | 1197                                   | 1161                | 1010                 | 965                  | 908                  | 528                  | 304                                    | 301                 | 258                  | 248                  | 237                  | 148                  |
| Dubrovnik [24]           | ✓                    | ✓                   | ✓                    | ✓                    | ✓                    | ✓                    | 5883                                   | 5850                | 5576                 | 5464                 | 5209                 | 4777                 | 1252                                   | 1250                | 1127                 | 1073                 | 978                  | 780                  |
| Rome [24]                | ✓                    | ✓                   | ✓                    | ✓                    | ✓                    | ✓                    | 1812                                   | 1812                | 1807                 | 1728                 | 1742                 | 1655                 | 395                                    | 395                 | 389                  | 389                  | 389                  | 391                  |
| Quad [5]                 | ✓                    | ✓                   | ✓                    | ✓                    | ✓*                   | ✓*                   | 5729                                   | 5569                | 4360                 | 3843                 | 2044                 | 367                  | 1295                                   | 1277                | 1041                 | 882                  | 615                  | 50                   |

Table S2. Reconstruction statistics on **generic** datasets. ✓/✓\*/✗: Removed/Removed but over-split/Existing ghost artifacts. Our method sparsifies the graphs, reconstructing most cameras and 3D points avoiding ghost artifacts.

| Dataset                  | Mean Reprojection Errors (px) |                     |                      |                      |                      |                      | Mean Camera Rotation Difference (degrees) |                      |                      |                      |                      | Mean Camera Translation Difference |                      |                      |                      |                      |
|--------------------------|-------------------------------|---------------------|----------------------|----------------------|----------------------|----------------------|-------------------------------------------|----------------------|----------------------|----------------------|----------------------|------------------------------------|----------------------|----------------------|----------------------|----------------------|
|                          | $\mathcal{G}$                 | $\mathcal{G}_{LCT}$ | $\mathcal{G}_F(0.6)$ | $\mathcal{G}_F(0.7)$ | $\mathcal{G}_F(0.8)$ | $\mathcal{G}_F(0.9)$ | $\mathcal{G}_{LCT}$                       | $\mathcal{G}_F(0.6)$ | $\mathcal{G}_F(0.7)$ | $\mathcal{G}_F(0.8)$ | $\mathcal{G}_F(0.9)$ | $\mathcal{G}_{LCT}$                | $\mathcal{G}_F(0.6)$ | $\mathcal{G}_F(0.7)$ | $\mathcal{G}_F(0.8)$ | $\mathcal{G}_F(0.9)$ |
| Alamo [47]               | 0.66                          | 0.66                | 0.62                 | 0.59                 | 0.56                 | <b>0.54</b>          | 0.37                                      | 0.35                 | 0.34                 | 0.30                 | 0.20                 | 0.15                               | 0.22                 | 0.14                 | 0.11                 | 0.11                 |
| Gendarmenmarkt [47]      | 0.76                          | 0.76                | 0.61                 | 0.74                 | 0.73                 | <b>0.70</b>          | -                                         | -                    | -                    | -                    | -                    | -                                  | -                    | -                    | -                    | -                    |
| Madrid Metropolis [47]   | 0.62                          | 0.61                | 0.57                 | 0.58                 | 0.55                 | <b>0.52</b>          | 0.32                                      | 4.33                 | 4.91                 | 4.78                 | 0.19                 | 0.09                               | 0.56                 | 0.51                 | 0.55                 | 0.99                 |
| Montreal Notre Dame [47] | 0.86                          | 0.86                | 0.80                 | 0.79                 | 0.77                 | <b>0.72</b>          | 0.17                                      | 0.07                 | 0.06                 | 0.07                 | 0.07                 | 0.03                               | 0.03                 | 0.03                 | 0.04                 | 0.03                 |
| Notre Dame [47]          | 0.76                          | 0.76                | 0.70                 | 0.68                 | 0.66                 | <b>0.62</b>          | -                                         | -                    | -                    | -                    | -                    | -                                  | -                    | -                    | -                    | -                    |
| NYC Library [47]         | 0.74                          | 0.74                | 0.71                 | 0.70                 | 0.67                 | <b>0.63</b>          | 0.22                                      | 0.07                 | 0.09                 | 0.07                 | 0.08                 | 0.04                               | 0.07                 | 0.09                 | 0.06                 | 0.02                 |
| Piccadilly [47]          | 0.76                          | 0.76                | 0.74                 | 0.72                 | 0.70                 | <b>0.66</b>          | -                                         | -                    | -                    | -                    | -                    | -                                  | -                    | -                    | -                    | -                    |
| Roman Forum [47]         | 0.76                          | 0.76                | 0.73                 | 0.72                 | 0.70                 | <b>0.64</b>          | 0.10                                      | 0.20                 | 0.20                 | 0.21                 | 0.27                 | 0.02                               | 0.02                 | 0.03                 | 0.02                 | 0.04                 |
| Tower of London [47]     | 0.63                          | 0.63                | 0.62                 | 0.61                 | 0.60                 | <b>0.56</b>          | 0.09                                      | 0.12                 | 0.13                 | 0.17                 | 0.31                 | 0.06                               | 0.03                 | 0.03                 | 0.04                 | 0.03                 |
| Trafalgar [47]           | 0.74                          | 0.74                | 0.73                 | 0.72                 | 0.69                 | <b>0.66</b>          | 0.61                                      | 2.30                 | 1.14                 | 1.20                 | 3.00                 | 0.93                               | 0.13                 | 0.10                 | 0.11                 | 0.15                 |
| Union Square [47]        | 0.74                          | 0.73                | 0.69                 | 0.69                 | 0.67                 | <b>0.61</b>          | 2.20                                      | 5.94                 | 2.95                 | 3.27                 | 0.98                 | 0.51                               | 0.41                 | 0.57                 | 0.69                 | 0.27                 |
| Vienna Cathedral [47]    | 0.75                          | 0.75                | 0.74                 | 0.73                 | 0.71                 | <b>0.70</b>          | -                                         | -                    | -                    | -                    | -                    | -                                  | -                    | -                    | -                    | -                    |
| Dubrovnik [24]           | 0.76                          | 0.76                | 0.73                 | 0.72                 | 0.70                 | <b>0.66</b>          | 0.09                                      | 0.12                 | 0.13                 | 0.24                 | 0.35                 | 0.01                               | 0.01                 | 0.02                 | 0.02                 | 0.20                 |
| Rome [24]                | 0.90                          | 0.90                | 0.87                 | 0.85                 | 0.82                 | <b>0.77</b>          | 0.01                                      | 0.03                 | 0.03                 | 0.04                 | 0.06                 | 0.04                               | 0.05                 | 0.03                 | 0.04                 | 0.04                 |
| Quad [5]                 | 0.69                          | 0.69                | 0.67                 | 0.66                 | 0.65                 | <b>0.62</b>          | 0.34                                      | 0.71                 | 1.33                 | 0.72                 | 0.31                 | 0.02                               | 0.05                 | 0.09                 | 0.06                 | 0.04                 |

Table S3. Reprojection errors and camera motion differences (with camera motions from original graphs  $\mathcal{G}$  as reference) on **generic** datasets. Camera translation difference is specified in the units obtained from the output of COLMAP [36] on the original graphs  $\mathcal{G}$ . **Bold** values indicate least reprojection error in each dataset. ‘-’ indicates that reconstruction from the original graph contains ghost artifacts and is not used for comparison of camera motions.

| Dataset                  | Reconstruction Time (mins) ( $t_R$ ) |                     |                      |                      |                      |                      |
|--------------------------|--------------------------------------|---------------------|----------------------|----------------------|----------------------|----------------------|
|                          | $\mathcal{G}$                        | $\mathcal{G}_{LCT}$ | $\mathcal{G}_F(0.6)$ | $\mathcal{G}_F(0.7)$ | $\mathcal{G}_F(0.8)$ | $\mathcal{G}_F(0.9)$ |
| Alamo [47]               | 44                                   | 44                  | 28                   | 25                   | 28                   | 16                   |
| Gendarmenmarkt [47]      | 372                                  | 339                 | 144                  | 103                  | 74                   | 36                   |
| Madrid Metropolis [47]   | 88                                   | 90                  | 22                   | 21                   | 16                   | 3                    |
| Montreal Notre Dame [47] | 114                                  | 100                 | 50                   | 52                   | 38                   | 25                   |
| Notre Dame [47]          | 2054                                 | 2131                | 1323                 | 758                  | 514                  | 206                  |
| NYC Library [47]         | 105                                  | 101                 | 40                   | 40                   | 34                   | 15                   |
| Piccadilly [47]          | 1969                                 | 1409                | 1060                 | 1000                 | 1035                 | 452                  |
| Roman Forum [47]         | 784                                  | 810                 | 477                  | 453                  | 269                  | 60                   |
| Tower of London [47]     | 95                                   | 86                  | 44                   | 42                   | 36                   | 16                   |
| Trafalgar [47]           | 6875                                 | 5601                | 3852                 | 3698                 | 2795                 | 1962                 |
| Union Square [47]        | 220                                  | 185                 | 80                   | 86                   | 60                   | 51                   |
| Vienna Cathedral [47]    | 793                                  | 703                 | 398                  | 376                  | 225                  | 107                  |
| Dubrovnik [24]           | 582                                  | 556                 | 521                  | 428                  | 367                  | 276                  |
| Rome [24]                | 284                                  | 280                 | 279                  | 265                  | 227                  | 139                  |
| Quad [5]                 | 417                                  | 418                 | 318                  | 249                  | 133                  | 23                   |

Table S4. Reconstruction time using COLMAP [36] on **generic** datasets. Applying our method for graph sparsification recovers most part of the reconstruction of the original graph with reduced reconstruction time.

| Dataset                  | Time Taken for Filter (sec) |                      |                      |                      |                      | Time Taken for Preprocessing + Filter (sec) |                      |                      |                      |                      |
|--------------------------|-----------------------------|----------------------|----------------------|----------------------|----------------------|---------------------------------------------|----------------------|----------------------|----------------------|----------------------|
|                          | $\mathcal{G}_{LCT}$         | $\mathcal{G}_F(0.6)$ | $\mathcal{G}_F(0.7)$ | $\mathcal{G}_F(0.8)$ | $\mathcal{G}_F(0.9)$ | $\mathcal{G}_{LCT}$                         | $\mathcal{G}_F(0.6)$ | $\mathcal{G}_F(0.7)$ | $\mathcal{G}_F(0.8)$ | $\mathcal{G}_F(0.9)$ |
| Alamo [47]               | 13                          | 10                   | 11                   | 15                   | 11                   | 13                                          | 23                   | 25                   | 28                   | 24                   |
| Gendarmenmarkt [47]      | 12                          | 12                   | 14                   | 18                   | 14                   | 12                                          | 25                   | 27                   | 31                   | 27                   |
| Madrid Metropolis [47]   | 2                           | 2                    | 2                    | 2                    | 2                    | 2                                           | 4                    | 4                    | 5                    | 4                    |
| Montreal Notre Dame [47] | 23                          | 10                   | 11                   | 13                   | 11                   | 23                                          | 33                   | 35                   | 36                   | 34                   |
| NYC Library [47]         | 3                           | 1                    | 2                    | 1                    | 1                    | 3                                           | 4                    | 5                    | 4                    | 4                    |
| Notre Dame [47]          | 113                         | 125                  | 169                  | 182                  | 143                  | 113                                         | 238                  | 282                  | 295                  | 257                  |
| Piccadilly [47]          | 83                          | 87                   | 97                   | 113                  | 101                  | 83                                          | 170                  | 181                  | 197                  | 184                  |
| Roman Forum [47]         | 7                           | 7                    | 8                    | 11                   | 8                    | 7                                           | 14                   | 15                   | 18                   | 16                   |
| Tower of London [47]     | 2                           | 2                    | 2                    | 3                    | 2                    | 2                                           | 4                    | 4                    | 5                    | 4                    |
| Trafalgar [47]           | 405                         | 438                  | 503                  | 526                  | 512                  | 405                                         | 844                  | 909                  | 932                  | 918                  |
| Union Square [47]        | 12                          | 11                   | 12                   | 17                   | 13                   | 12                                          | 23                   | 24                   | 29                   | 24                   |
| Vienna Cathedral [47]    | 53                          | 42                   | 53                   | 56                   | 47                   | 53                                          | 94                   | 105                  | 109                  | 99                   |
| Dubrovnik [24]           | 182                         | 223                  | 233                  | 246                  | 446                  | 182                                         | 405                  | 414                  | 428                  | 628                  |
| Rome [24]                | 5038                        | 4440                 | 5305                 | 4798                 | 4792                 | 5038                                        | 9478                 | 10343                | 9836                 | 9830                 |
| Quad [5]                 | 73                          | 83                   | 99                   | 92                   | 93                   | 73                                          | 152                  | 173                  | 166                  | 167                  |

Table S5. Time taken by our method (Algo. 1) on **generic** datasets. Preprocessing time: Steps 1-3 of Algo. 1. Filter time: Steps 4-11 of Algo. 1. Our method takes < 1% of the reconstruction time for most datasets.

| Dataset                         | Number of Nodes |                       |                        |                        |                        |                        |                        | Number of Edges |                       |                        |                        |                        |                        |                        |
|---------------------------------|-----------------|-----------------------|------------------------|------------------------|------------------------|------------------------|------------------------|-----------------|-----------------------|------------------------|------------------------|------------------------|------------------------|------------------------|
|                                 | $ \mathcal{V} $ | $ \mathcal{V}_{LCT} $ | $ \mathcal{V}_{Dopp} $ | $ \mathcal{V}_F(0.6) $ | $ \mathcal{V}_F(0.7) $ | $ \mathcal{V}_F(0.8) $ | $ \mathcal{V}_F(0.9) $ | $ \mathcal{E} $ | $ \mathcal{E}_{LCT} $ | $ \mathcal{E}_{Dopp} $ | $ \mathcal{E}_F(0.6) $ | $ \mathcal{E}_F(0.7) $ | $ \mathcal{E}_F(0.8) $ | $ \mathcal{E}_F(0.9) $ |
| Louvre [46]                     | 3443            | 1349                  | 557                    | 1232                   | 1144                   | 948                    | 763                    | 47063           | 31206                 | 3766                   | 9518                   | 6963                   | 4328                   | 2245                   |
| Notre Dame [46]                 | 12720           | 11836                 | 8199                   | 11190                  | 10686                  | 10011                  | 8298                   | 447199          | 441860                | 271483                 | 210531                 | 156583                 | 103759                 | 50583                  |
| Sacre Coeur [46]                | 5228            | 4927                  | 4701                   | 4576                   | 4420                   | 4226                   | 3647                   | 218469          | 217083                | 161611                 | 76229                  | 55757                  | 36101                  | 17606                  |
| Seville [46]                    | 2262            | 1586                  | 1474                   | 1496                   | 1295                   | 1194                   | -                      | 42390           | 33467                 | 21543                  | 11974                  | 7893                   | 5303                   | -                      |
| Ellis Island [47]               | 2075            | 1677                  | 840                    | 1541                   | 1490                   | 1373                   | 1068                   | 40266           | 39236                 | 10871                  | 17622                  | 13168                  | 8769                   | 4445                   |
| Piazza del Popolo [47]          | 1666            | 1148                  | 1069                   | 991                    | 946                    | 862                    | 713                    | 29392           | 26341                 | 16643                  | 8153                   | 6030                   | 3925                   | 1903                   |
| Yorkminster [47]                | 2534            | 1935                  | 1104                   | 1694                   | 1550                   | 1249                   | -                      | 40483           | 36416                 | 16825                  | 12590                  | 9120                   | 5826                   | -                      |
| Alexander Nevsky Cathedral [17] | 448             | 448                   | 447                    | 431                    | 427                    | 426                    | 420                    | 29111           | 29111                 | 12580                  | 2773                   | 2419                   | 2073                   | 1705                   |
| Arc de Triomphe [17]            | 434             | 434                   | 415                    | 416                    | 412                    | 406                    | 400                    | 14565           | 14556                 | 9597                   | 4303                   | 3669                   | 3072                   | 2461                   |
| Berliner Dom [17]               | 1618            | 1618                  | 1615                   | 1613                   | 1603                   | 1591                   | 1580                   | 92255           | 92224                 | 77981                  | 46634                  | 39835                  | 32866                  | 26099                  |
| Big Ben [17]                    | 402             | 402                   | 397                    | 391                    | 388                    | 383                    | 373                    | 19598           | 19598                 | 10685                  | 3547                   | 3083                   | 2637                   | 2181                   |
| Brandenburg Gate [17]           | 175             | 175                   | 153                    | 133                    | 123                    | 112                    | 101                    | 9300            | 9300                  | 7151                   | 401                    | 340                    | 273                    | 206                    |
| Church on Spilled Blood [17]    | 277             | 277                   | 265                    | 142                    | 141                    | 139                    | 133                    | 14765           | 14765                 | 7387                   | 644                    | 579                    | 503                    | 415                    |
| Indoor [17]                     | 152             | 152                   | 152                    | 42                     | 42                     | 33                     | 28                     | 8787            | 8787                  | 2382                   | 41                     | 41                     | 32                     | 27                     |
| Radcliffe Camera [17]           | 282             | 282                   | 281                    | 177                    | 121                    | 115                    | 114                    | 13900           | 13900                 | 6456                   | 929                    | 591                    | 500                    | 422                    |
| Books [49]                      | 21              | 21                    | 21                     | 9                      | 7                      | 7                      | 7                      | 208             | 208                   | 92                     | 11                     | 9                      | 9                      | 9                      |
| Cereal [49]                     | 25              | 25                    | 25                     | 7                      | 7                      | 7                      | 7                      | 294             | 294                   | 215                    | 9                      | 6                      | 6                      | 6                      |
| Cup [49]                        | 64              | 64                    | 63                     | 64                     | 64                     | 40                     | 40                     | 2016            | 2016                  | 125                    | 81                     | 72                     | 44                     | 42                     |
| Desk [49]                       | 31              | 31                    | 31                     | 12                     | 11                     | 11                     | 11                     | 446             | 446                   | 188                    | 12                     | 11                     | 11                     | 11                     |
| Oats [49]                       | 23              | 23                    | 23                     | 9                      | 9                      | 9                      | 9                      | 252             | 252                   | 140                    | 11                     | 11                     | 10                     | 10                     |
| Street [49]                     | 19              | 19                    | 10                     | 19                     | 19                     | 10                     | 9                      | 171             | 171                   | 13                     | 19                     | 19                     | 9                      | 8                      |
| Temple of Heaven [49]           | 338             | 338                   | 338                    | 338                    | 338                    | 338                    | 338                    | 20116           | 20116                 | 1782                   | 11234                  | 8854                   | 6385                   | 4142                   |

Table S6. Dataset details of **ambiguous** datasets. ‘-’ represents that the largest connected component does not have enough nodes and edges to obtain a reconstruction. A steady decrease in the number of edges is observed with increasing minimum edge score  $m$  but not on the number of nodes.



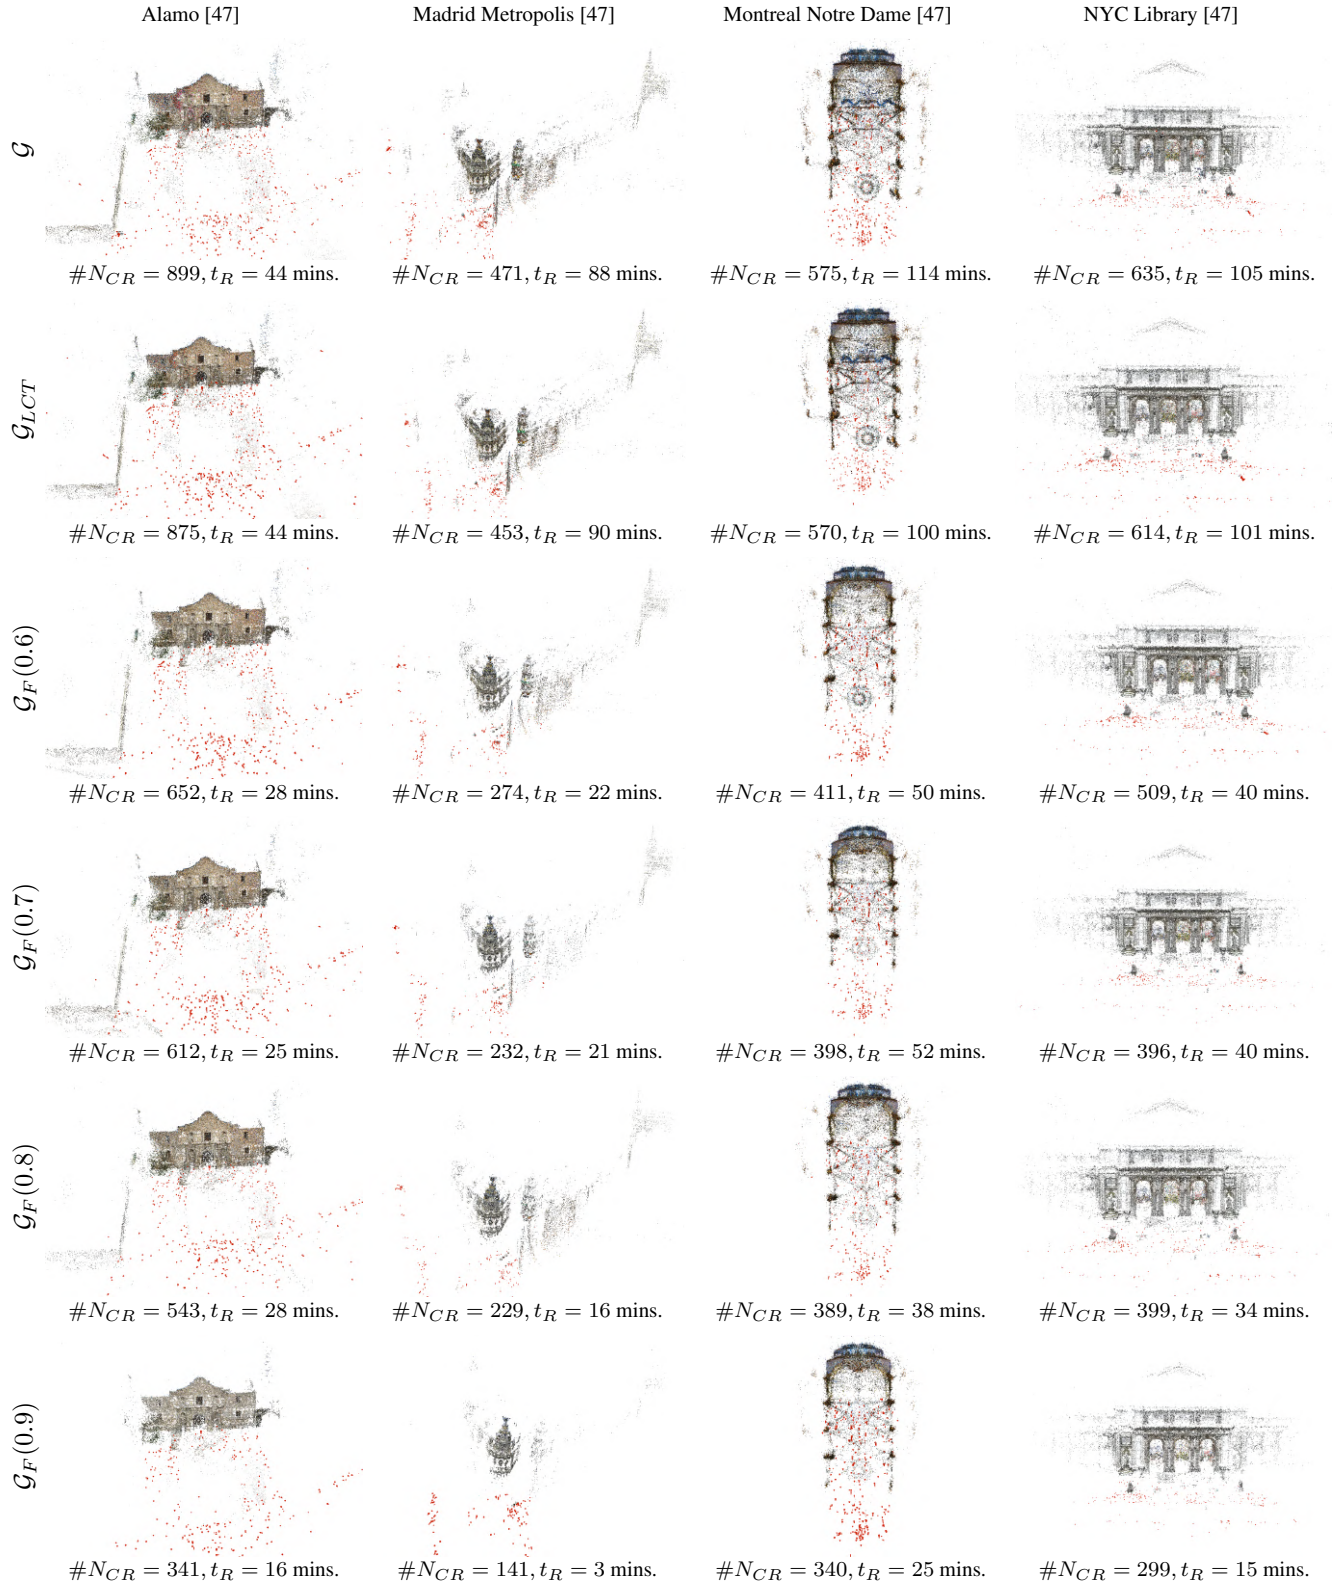

Figure S1. Reconstructions obtained with different graphs on **generic** datasets from [47]. # $N_{CR}$ : Number of cameras reconstructed,  $t_R$ : Reconstruction time using COLMAP [36]. Recommended minimum edge score ( $m$ ): 0.6 to 0.7.

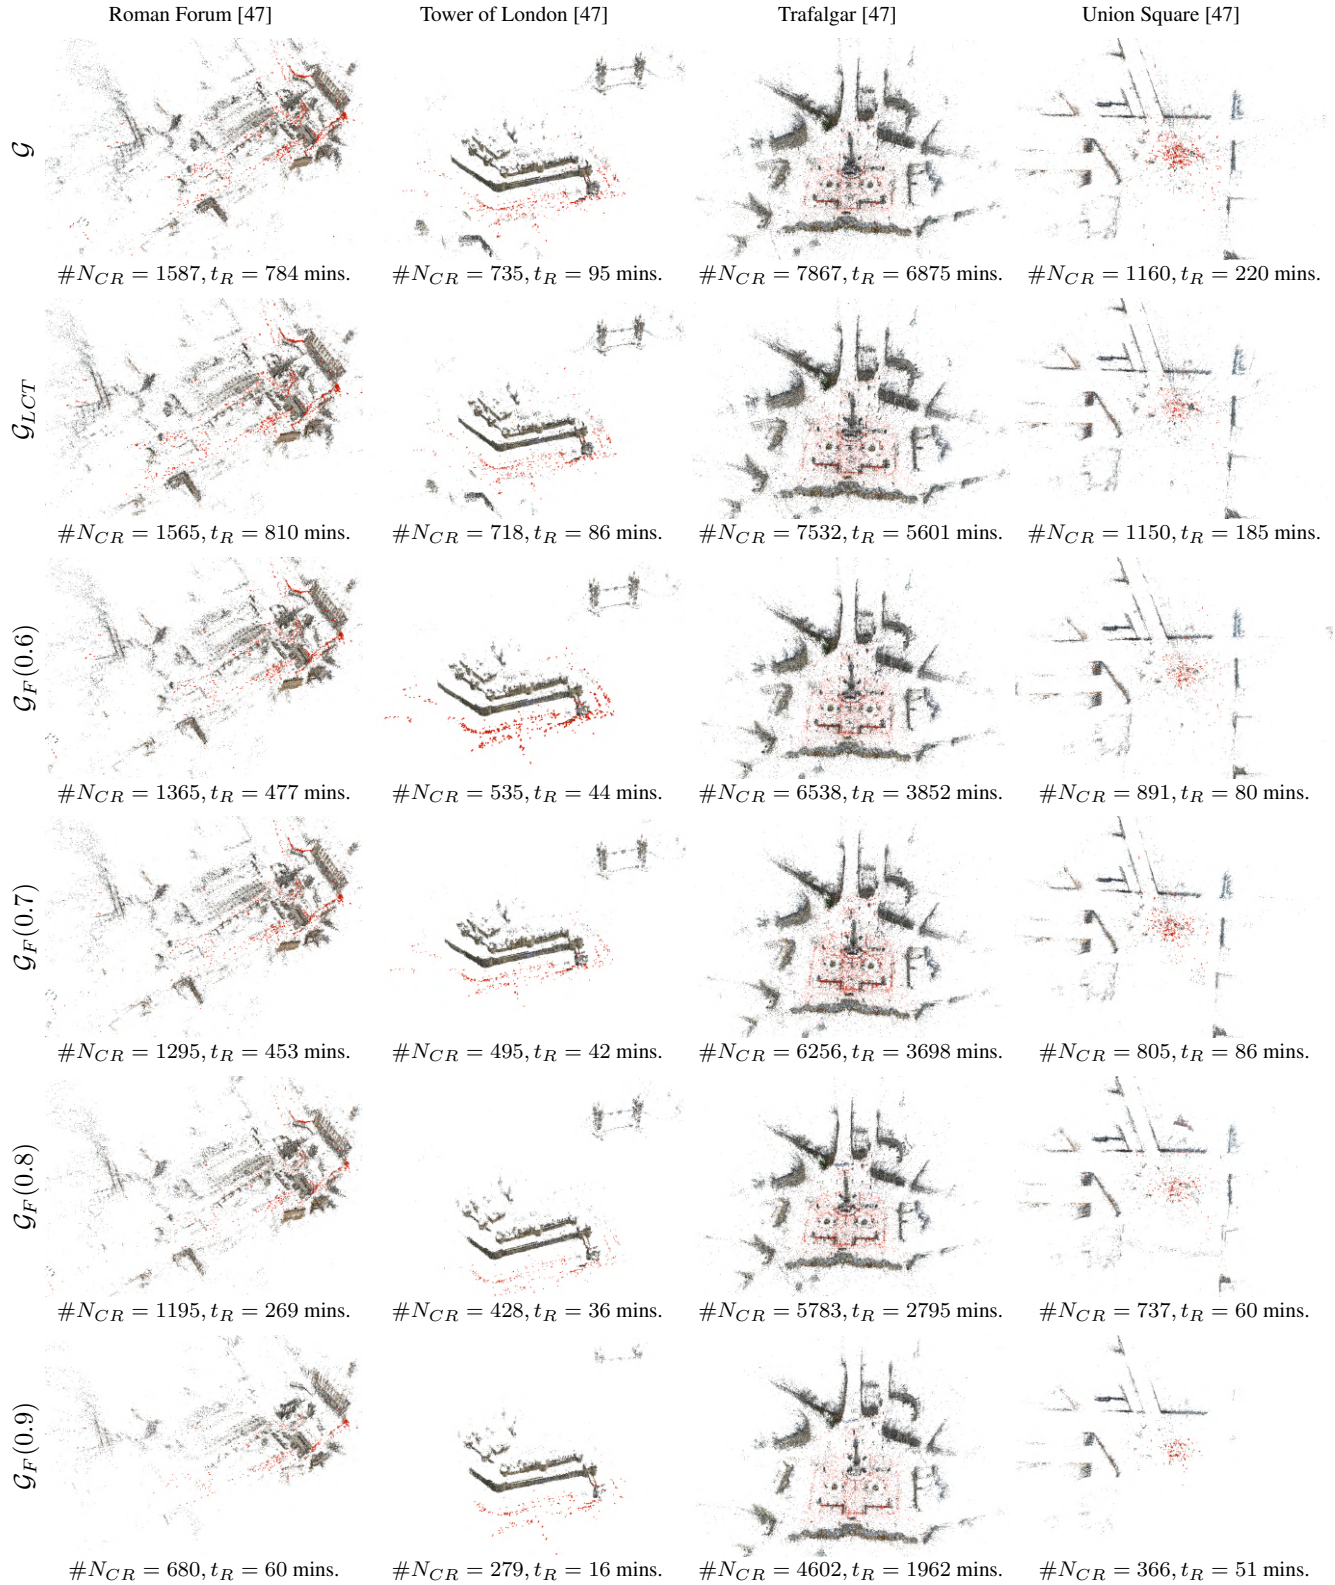

Figure S2. Reconstructions obtained with different graphs on **generic** datasets from [47]. # $N_{CR}$ : Number of cameras reconstructed,  $t_R$ : Reconstruction time using COLMAP [36]. Recommended minimum edge score ( $m$ ): 0.6 to 0.7.



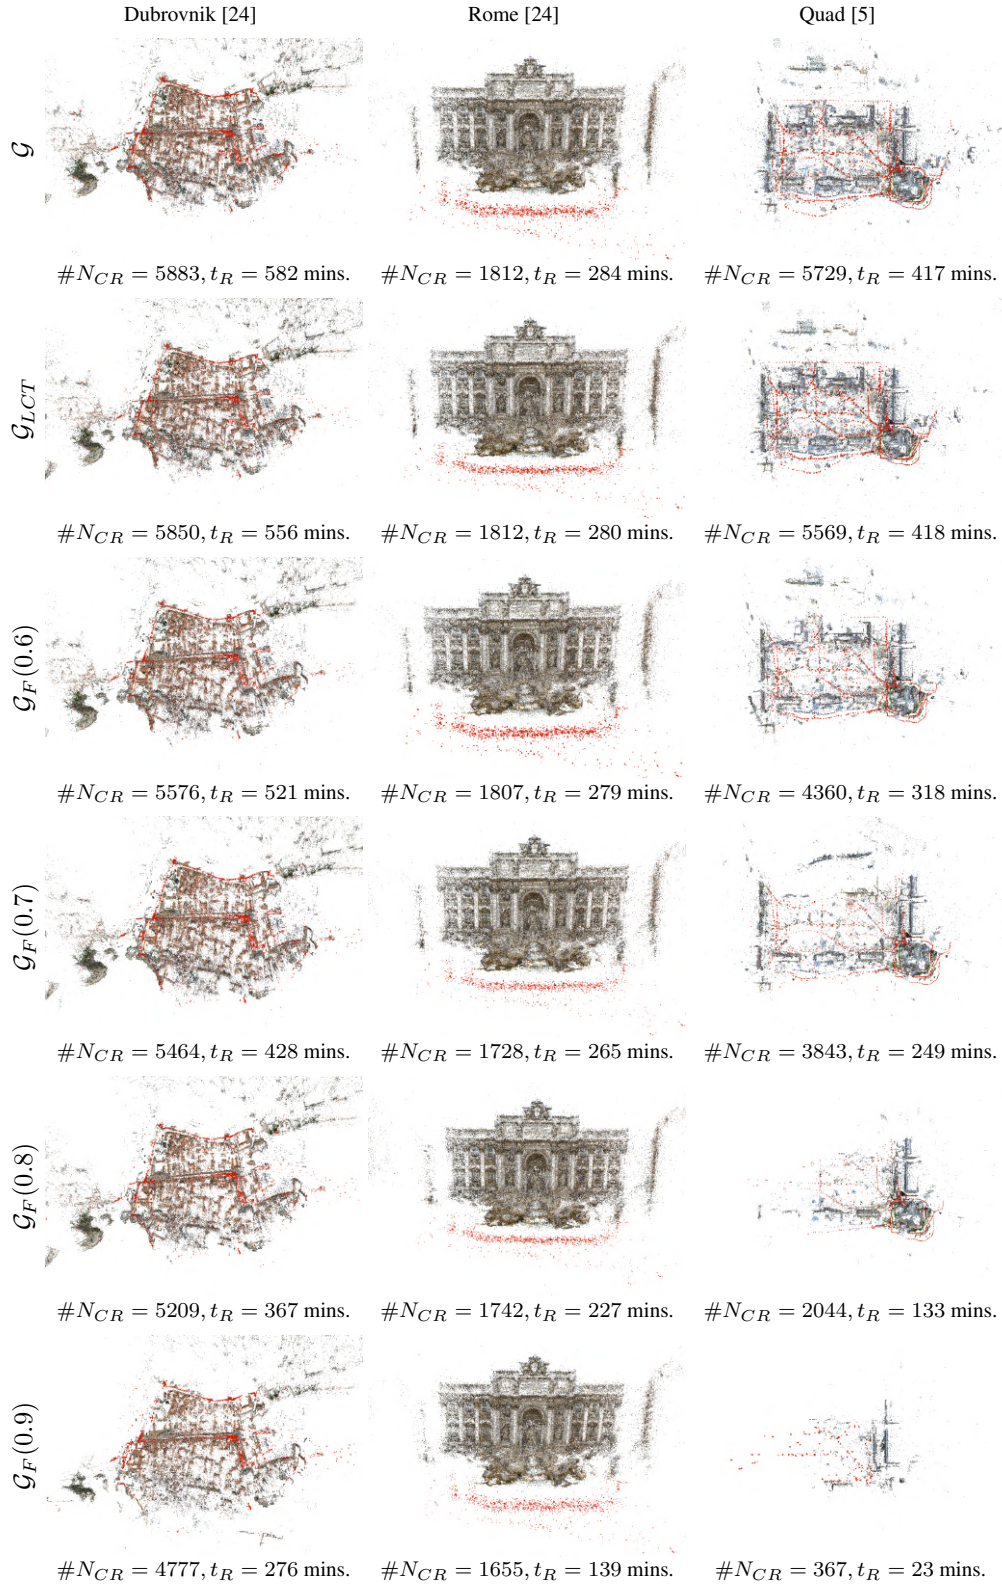

Figure S3. Reconstructions obtained with different graphs on **generic** datasets from [24] and [5].  $\#N_{CR}$ : Number of cameras reconstructed,  $t_R$ : Reconstruction time using COLMAP [36]. Recommended minimum edge score ( $m$ ): 0.6 to 0.7.



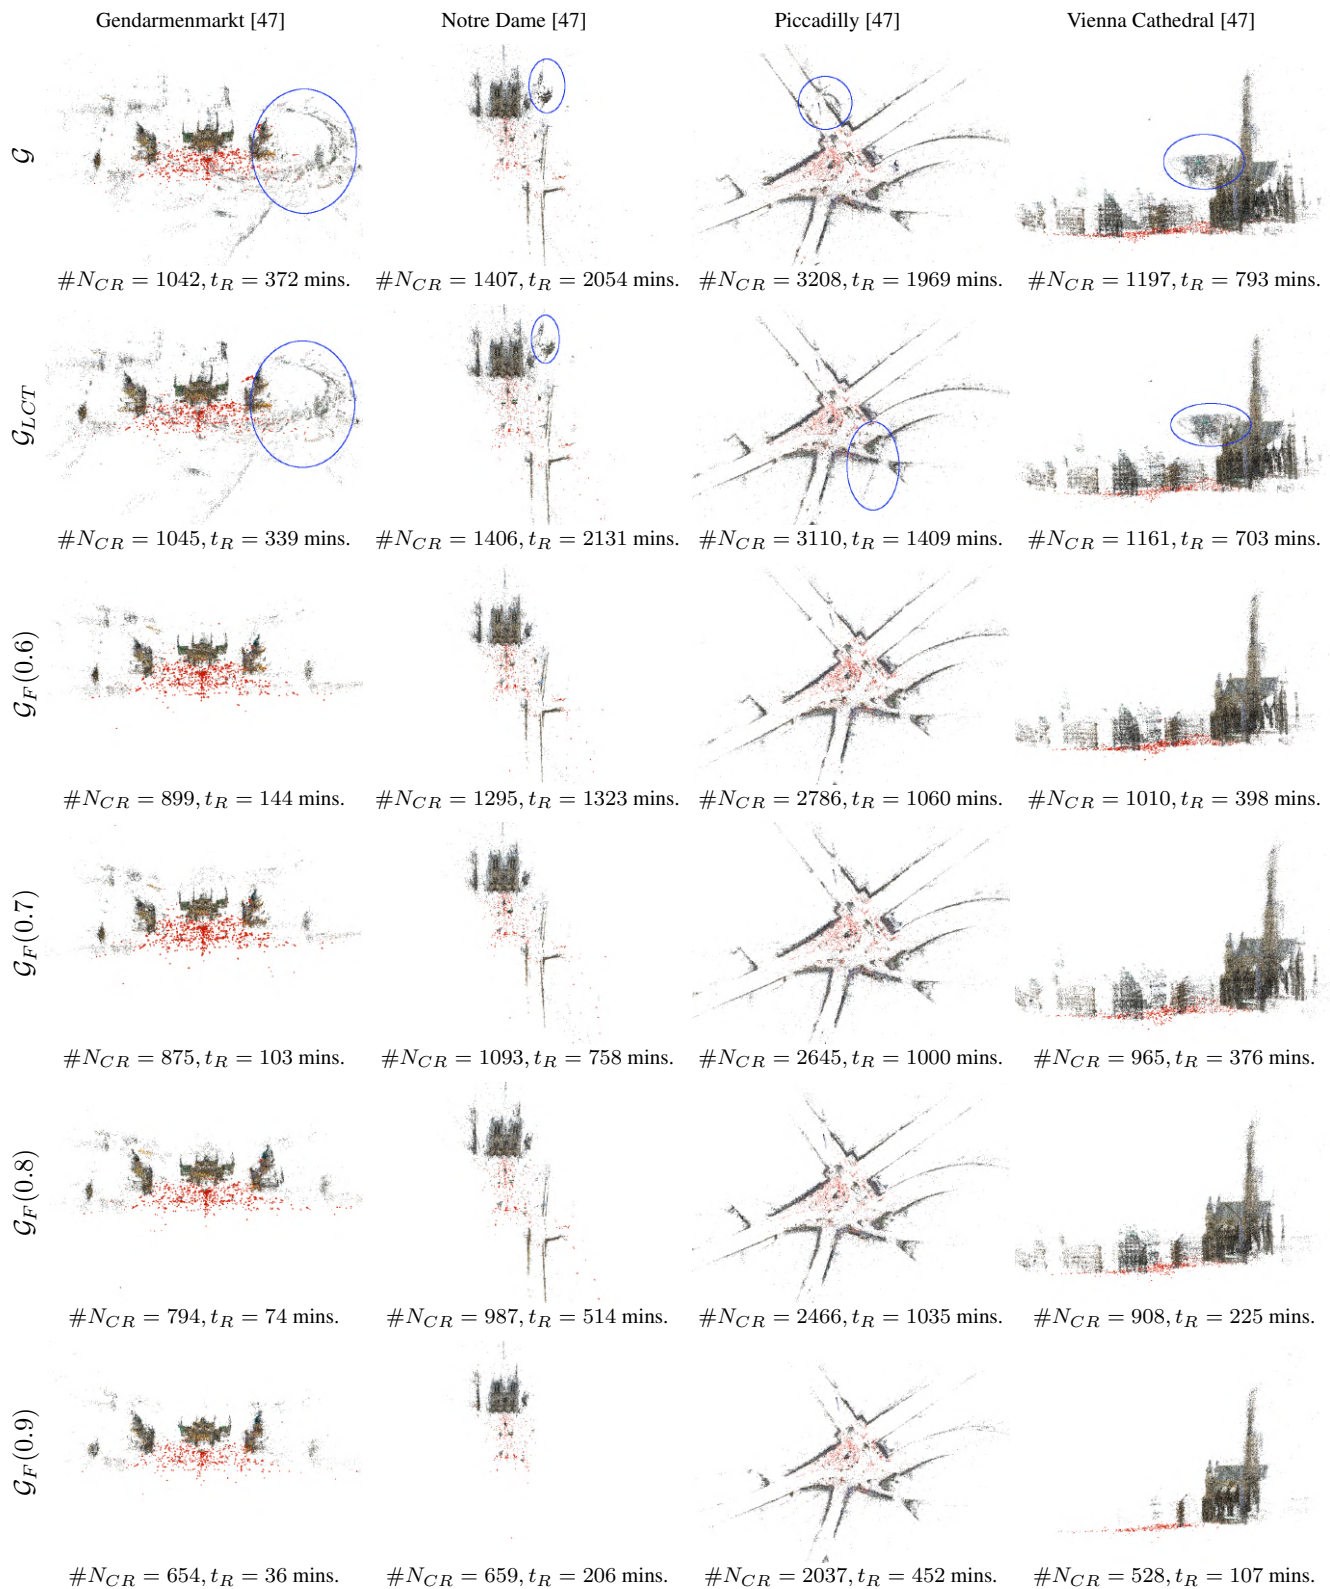

Figure S4. Reconstructions obtained with different graphs on **generic** datasets from [47] where ghost artifacts are marked in blue.  $\#N_{CR}$ : Number of cameras reconstructed,  $t_R$ : Reconstruction time using COLMAP [36]. Recommended minimum edge score ( $m$ ): 0.6 to 0.7.

| Dataset                         | COLMAP [36] | Heinly [17] | Wilson [46] | Cui [6] | Yan [49] | Cai [3] | Ours |
|---------------------------------|-------------|-------------|-------------|---------|----------|---------|------|
| Louvre [46]                     | ✓           | -           | ✗           | ✓       | ✓        | ✓       | ✓    |
| Notre Dame [46]                 | ✗           | -           | ✗           | ✓       | -*       | ✓       | ✓    |
| Sacre Coeur [46]                | ✗           | ✓           | ✓           | ✓       | ✓        | ✓       | ✓    |
| Seville [46]                    | ✗           | ✗           | ✓*          | ✓*      | ✓*       | ✓       | ✓    |
| Ellis Island [47]               | ✗           | -           | ✓           | ✓*      | ✓        | ✓       | ✓    |
| Piazza del Popolo [47]          | ✗           | -           | ✗           | ✓*      | ✓*       | ✓       | ✓    |
| Yorkminster [47]                | ✗           | -           | ✓           | ✓       | ✓        | ✓       | ✓    |
| Alexander Nevsky Cathedral [17] | ✗           | ✓           | ✗           | ✓       | ✓        | ✓       | ✓    |
| Arc de Triomphe [17]            | ✗           | ✓           | ✗           | ✗       | ✓        | ✓       | ✓    |
| Berliner Dom [17]               | ✗           | ✓           | ✓*          | ✓       | ✓        | ✓       | ✓    |
| Big Ben [17]                    | ✗           | ✓           | ✓           | ✗       | ✗        | ✓       | ✓    |
| Brandenburg Gate [17]           | ✗           | ✓           | ✗           | ✓*      | ✓*       | ✓*      | ✓*   |
| Church on Spilled Blood [17]    | ✗           | ✓           | ✗           | ✓       | ✗        | ✗       | ✓    |
| Indoor [17]                     | ✗           | ✓           | ✗           | ✓       | ✓        | ✓       | ✓    |
| Radcliffe Camera [17]           | ✗           | ✓           | ✓*          | ✓*      | ✓*       | ✓*      | ✓*   |
| Books [49]                      | ✗           | -           | ✗           | ✗       | ✗        | ✗       | ✓*   |
| Cereal [49]                     | ✗           | ✓           | ✗           | ✗       | ✓        | ✗       | ✓*   |
| Cup [49]                        | ✗           | ✗           | ✗           | ✗       | ✗        | ✓       | ✗    |
| Desk [49]                       | ✗           | -           | ✗           | ✓       | ✓        | ✓       | ✓*   |
| Oats [49]                       | ✗           | -           | ✗           | ✗       | ✗        | ✗       | ✓*   |
| Street [49]                     | ✗           | ✗           | ✗           | ✓       | ✗        | ✓*      | ✓    |
| Temple of Heaven [49]           | ✓           | -           | ✓           | ✓       | ✓*       | ✓       | ✓    |

Table S7. Comparison of our proposed method with other methods on **ambiguous** datasets. ✓/✓\*/✗: Disambiguated/Disambiguated but oversplit/Non-disambiguated reconstructions. Results of [17] are shown as reported in [3] ('-' means results not reported in [3]). '-\*' means code failed to execute. Our method disambiguates all datasets except Cup.

| Dataset                         | Disambiguated |                     |                      |                      |                      |                      |                      | # Cameras Reconstructed (# $N_{CR}$ ) |                     |                      |                      |                      |                      |                      | # 3D Points Reconstructed (in $10^3$ ) |                     |                      |                      |                      |                      |                      |
|---------------------------------|---------------|---------------------|----------------------|----------------------|----------------------|----------------------|----------------------|---------------------------------------|---------------------|----------------------|----------------------|----------------------|----------------------|----------------------|----------------------------------------|---------------------|----------------------|----------------------|----------------------|----------------------|----------------------|
|                                 | $\mathcal{G}$ | $\mathcal{G}_{LCR}$ | $\mathcal{G}_{Dopp}$ | $\mathcal{G}_F(0.6)$ | $\mathcal{G}_F(0.7)$ | $\mathcal{G}_F(0.8)$ | $\mathcal{G}_F(0.9)$ | $\mathcal{G}$                         | $\mathcal{G}_{LCR}$ | $\mathcal{G}_{Dopp}$ | $\mathcal{G}_F(0.6)$ | $\mathcal{G}_F(0.7)$ | $\mathcal{G}_F(0.8)$ | $\mathcal{G}_F(0.9)$ | $\mathcal{G}$                          | $\mathcal{G}_{LCR}$ | $\mathcal{G}_{Dopp}$ | $\mathcal{G}_F(0.6)$ | $\mathcal{G}_F(0.7)$ | $\mathcal{G}_F(0.8)$ | $\mathcal{G}_F(0.9)$ |
| Louvre [46]                     | ✓             | ✓                   | ✓                    | ✗                    | ✗                    | ✓                    | ✓                    | 367                                   | 359                 | 320                  | 320                  | 317                  | 213                  | 186                  | 128                                    | 129                 | 108                  | 113                  | 110                  | 77                   | 69                   |
| Notre Dame [46]                 | ✗             | ✗                   | ✓                    | ✓                    | ✓                    | ✓                    | ✓                    | 7952                                  | 7778                | 5481                 | 5420                 | 5277                 | 4921                 | 3977                 | 1785                                   | 1775                | 1314                 | 1306                 | 1280                 | 1226                 | 1053                 |
| Sacre Coeur [46]                | ✗             | ✗                   | ✓                    | ✗                    | ✗                    | ✗                    | ✓                    | 4492                                  | 4443                | 3796                 | 2740                 | 2645                 | 2498                 | 1984                 | 711                                    | 706                 | 548                  | 475                  | 450                  | 449                  | 347                  |
| Seville [46]                    | ✗             | ✗                   | ✓                    | ✓                    | ✓                    | ✓                    | ✗*                   | 1510                                  | 1498                | 447                  | 475                  | 253                  | 231                  | -                    | 353                                    | 353                 | 109                  | 117                  | 74                   | 71                   | -                    |
| Ellis Island [47]               | ✗             | ✗                   | ✓                    | ✓                    | ✗                    | ✓                    | ✓                    | 880                                   | 910                 | 314                  | 333                  | 614                  | 319                  | 288                  | 164                                    | 171                 | 84                   | 89                   | 122                  | 87                   | 75                   |
| Piazza del Popolo [47]          | ✗             | ✗                   | ✓                    | ✓                    | ✓                    | ✓                    | ✓*                   | 1023                                  | 1012                | 922                  | 865                  | 818                  | 420                  | 299                  | 138                                    | 136                 | 123                  | 110                  | 101                  | 52                   | 40                   |
| Yorkminster [47]                | ✗             | ✗                   | ✓                    | ✓                    | ✓                    | ✓                    | ✗*                   | 1065                                  | 1027                | 585                  | 520                  | 457                  | 388                  | -                    | 284                                    | 280                 | 173                  | 162                  | 141                  | 126                  | -                    |
| Alexander Nevsky Cathedral [17] | ✗             | ✗                   | ✓                    | ✓                    | ✓                    | ✓                    | ✓                    | 447                                   | 447                 | 445                  | 429                  | 426                  | 425                  | 419                  | 100                                    | 100                 | 90                   | 83                   | 82                   | 81                   | 79                   |
| Arc de Triomphe [17]            | ✗             | ✗                   | ✓                    | ✓                    | ✓                    | ✓                    | ✓                    | 427                                   | 425                 | 392                  | 394                  | 387                  | 324                  | 317                  | 81                                     | 81                  | 69                   | 70                   | 69                   | 53                   | 52                   |
| Berliner Dom [17]               | ✗             | ✗                   | ✓                    | ✓                    | ✓                    | ✓                    | ✓                    | 1603                                  | 1603                | 1600                 | 1588                 | 1585                 | 1575                 | 1560                 | 242                                    | 242                 | 238                  | 234                  | 233                  | 232                  | 231                  |
| Big Ben [17]                    | ✗             | ✗                   | ✓                    | ✓                    | ✓                    | ✓                    | ✓                    | 397                                   | 398                 | 394                  | 379                  | 375                  | 365                  | 357                  | 74                                     | 74                  | 73                   | 67                   | 66                   | 65                   | 63                   |
| Brandenburg Gate [17]           | ✗             | ✗                   | ✓*                   | ✓*                   | ✓*                   | ✓*                   | ✓*                   | 172                                   | 172                 | 151                  | 129                  | 121                  | 110                  | 100                  | 24                                     | 24                  | 21                   | 14                   | 14                   | 12                   | 12                   |
| Church on Spilled Blood [17]    | ✗             | ✗                   | ✗                    | ✓                    | ✓                    | ✓                    | ✓                    | 273                                   | 274                 | 258                  | 136                  | 135                  | 131                  | 127                  | 69                                     | 69                  | 64                   | 30                   | 30                   | 29                   | 28                   |
| Indoor [17]                     | ✗             | ✗                   | ✓                    | ✓                    | ✓                    | ✓                    | ✓*                   | 152                                   | 152                 | 152                  | 42                   | 42                   | 33                   | 28                   | 73                                     | 73                  | 58                   | 9                    | 9                    | 9                    | 8                    |
| Radcliffe Camera [17]           | ✗             | ✗                   | ✓*                   | ✓*                   | ✓*                   | ✓*                   | ✓*                   | 279                                   | 280                 | 94                   | 177                  | 120                  | 115                  | 114                  | 76                                     | 76                  | 28                   | 40                   | 28                   | 27                   | 26                   |
| Books [49]                      | ✗             | ✗                   | ✗                    | ✓*                   | ✓*                   | ✓*                   | ✓*                   | 21                                    | 21                  | 21                   | 9                    | 7                    | 7                    | 7                    | 8                                      | 8                   | 7                    | 2                    | 2                    | 2                    | 2                    |
| Cereal [49]                     | ✗             | ✗                   | ✗                    | ✓*                   | ✓*                   | ✓*                   | ✓*                   | 25                                    | 25                  | 25                   | 7                    | 7                    | 7                    | 7                    | 12                                     | 12                  | 12                   | 3                    | 3                    | 3                    | 3                    |
| Cup [49]                        | ✗             | ✗                   | ✓                    | ✗                    | ✗                    | ✓*                   | ✓*                   | 64                                    | 64                  | 63                   | 64                   | 64                   | 40                   | 40                   | 6                                      | 6                   | 6                    | 5                    | 5                    | 3                    | 3                    |
| Desk [49]                       | ✓             | ✓                   | ✓                    | ✓*                   | ✓*                   | ✓*                   | ✓*                   | 31                                    | 31                  | 31                   | 12                   | 11                   | 11                   | 11                   | 14                                     | 14                  | 12                   | 3                    | 3                    | 3                    | 3                    |
| Oats [49]                       | ✗             | ✗                   | ✗                    | ✓*                   | ✓*                   | ✓*                   | ✓*                   | 23                                    | 23                  | 23                   | 9                    | 9                    | 9                    | 9                    | 8                                      | 8                   | 7                    | 3                    | 3                    | 3                    | 3                    |
| Street [49]                     | ✗             | ✗                   | ✓*                   | ✓*                   | ✓*                   | ✓*                   | ✓*                   | 19                                    | 19                  | 10                   | 19                   | 19                   | 10                   | 9                    | 4                                      | 4                   | 1                    | 2                    | 2                    | 1                    | 1                    |
| Temple of Heaven [49]           | ✓             | ✓                   | ✓                    | ✓                    | ✓                    | ✓                    | ✓                    | 338                                   | 338                 | 338                  | 338                  | 338                  | 338                  | 338                  | 192                                    | 192                 | 185                  | 196                  | 199                  | 200                  | 198                  |

Table S8. Reconstruction statistics on **ambiguous** datasets. ✓/✓\*/✗/✗\*: Disambiguated/Disambiguated but oversplit/Non-disambiguated reconstructions/No reconstruction obtained. Our method removes false edges and sparsifies the viewgraphs recovering most of the cameras and 3D points when compared to Doppelgangaers [3].

| Dataset                         | Mean Reprojection Errors (px) |                     |                      |                      |                      |                      |                      | Mean Camera Rotation Difference (degrees) |                     |                      |                      |                      |                      | Mean Camera Translation Difference |                     |                      |                      |                      |                      |
|---------------------------------|-------------------------------|---------------------|----------------------|----------------------|----------------------|----------------------|----------------------|-------------------------------------------|---------------------|----------------------|----------------------|----------------------|----------------------|------------------------------------|---------------------|----------------------|----------------------|----------------------|----------------------|
|                                 | $\mathcal{G}$                 | $\mathcal{G}_{LCT}$ | $\mathcal{G}_{Dopp}$ | $\mathcal{G}_F(0.6)$ | $\mathcal{G}_F(0.7)$ | $\mathcal{G}_F(0.8)$ | $\mathcal{G}_F(0.9)$ | $\mathcal{G}$                             | $\mathcal{G}_{LCT}$ | $\mathcal{G}_F(0.6)$ | $\mathcal{G}_F(0.7)$ | $\mathcal{G}_F(0.8)$ | $\mathcal{G}_F(0.9)$ | $\mathcal{G}$                      | $\mathcal{G}_{LCT}$ | $\mathcal{G}_F(0.6)$ | $\mathcal{G}_F(0.7)$ | $\mathcal{G}_F(0.8)$ | $\mathcal{G}_F(0.9)$ |
| Louvre [46]                     | 0.60                          | 0.60                | 0.60                 | 0.60                 | 0.58                 | <b>0.58</b>          | 0.60                 | 10.39                                     | 11.00               | 26.44                | 25.75                | 0.26                 | 0.26                 | 0.55                               | 0.60                | 1.21                 | 1.19                 | 0.28                 | 0.14                 |
| Notre Dame [46]                 | 0.73                          | 0.74                | 0.74                 | 0.72                 | 0.71                 | 0.69                 | <b>0.67</b>          | 0.10                                      | 0.10                | 0.21                 | 0.27                 | 0.18                 | 0.51                 | 0.01                               | 0.02                | 0.02                 | 0.03                 | 0.02                 | 0.07                 |
| Sacre Coeur [46]                | 0.70                          | 0.71                | 0.71                 | 0.68                 | 0.68                 | 0.67                 | <b>0.61</b>          | 0.92                                      | 2.54                | 2.49                 | 1.08                 | 0.91                 | 1.79                 | 0.32                               | 0.31                | 0.16                 | 0.20                 | 0.15                 | 0.32                 |
| Seville [46]                    | 0.68                          | 0.68                | 0.64                 | 0.62                 | 0.65                 | <b>0.63</b>          | -                    | 0.17                                      | 0.22                | 0.11                 | 0.11                 | 0.15                 | -                    | 0.02                               | 0.05                | 0.07                 | 0.11                 | 0.15                 | -                    |
| Ellis Island [47]               | 0.76                          | 0.75                | 0.80                 | 0.79                 | 0.74                 | 0.76                 | <b>0.74</b>          | 1.23                                      | 1.24                | 2.40                 | 2.44                 | 3.64                 | 1.39                 | 0.16                               | 0.16                | 0.13                 | 0.15                 | 0.21                 | 0.08                 |
| Piazza del Popolo [47]          | 0.69                          | 0.69                | 0.68                 | 0.67                 | 0.66                 | 0.68                 | <b>0.65</b>          | 87.09                                     | 87.21               | 1.76                 | 1.75                 | 0.42                 | 0.08                 | 3.71                               | 3.70                | 0.23                 | 0.23                 | 0.08                 | 0.03                 |
| Yorkminster [47]                | 0.75                          | 0.75                | 0.77                 | 0.76                 | 0.76                 | <b>0.74</b>          | -                    | 0.39                                      | 0.34                | 0.13                 | 0.15                 | 0.28                 | -                    | 0.06                               | 0.06                | 0.03                 | 0.08                 | 0.19                 | -                    |
|                                 | $\mathcal{G}$                 | $\mathcal{G}_{LCT}$ | $\mathcal{G}_{Dopp}$ | $\mathcal{G}_F(0.3)$ | $\mathcal{G}_F(0.4)$ | $\mathcal{G}_F(0.5)$ | $\mathcal{G}_F(0.6)$ | $\mathcal{G}$                             | $\mathcal{G}_{LCT}$ | $\mathcal{G}_F(0.3)$ | $\mathcal{G}_F(0.4)$ | $\mathcal{G}_F(0.5)$ | $\mathcal{G}_F(0.6)$ | $\mathcal{G}$                      | $\mathcal{G}_{LCT}$ | $\mathcal{G}_F(0.3)$ | $\mathcal{G}_F(0.4)$ | $\mathcal{G}_F(0.5)$ | $\mathcal{G}_F(0.6)$ |
| Alexander Nevsky Cathedral [17] | 0.67                          | 0.67                | 0.68                 | 0.62                 | 0.61                 | 0.60                 | <b>0.58</b>          | 68.33                                     | 67.97               | 0.06                 | 0.08                 | 0.08                 | 0.59                 | 3.40                               | 3.40                | 0.01                 | 0.02                 | 0.01                 | 0.04                 |
| Arc de Triomphe [17]            | 0.66                          | 0.66                | 0.66                 | 0.64                 | 0.64                 | 0.63                 | <b>0.62</b>          | 68.06                                     | 67.84               | 2.98                 | 1.23                 | 1.21                 | 0.30                 | 2.78                               | 2.72                | 0.29                 | 0.24                 | 0.18                 | 0.15                 |
| Berliner Dom [17]               | 0.70                          | 0.70                | 0.70                 | 0.68                 | 0.67                 | 0.66                 | <b>0.65</b>          | 45.54                                     | 45.70               | 0.09                 | 0.09                 | 0.10                 | 0.09                 | 2.49                               | 2.50                | 0.03                 | 0.03                 | 0.03                 | 0.03                 |
| Big Ben [17]                    | 0.64                          | 0.64                | 0.64                 | 0.61                 | 0.60                 | 0.59                 | <b>0.59</b>          | 50.48                                     | 50.41               | 2.44                 | 1.49                 | 1.52                 | 1.03                 | 1.42                               | 1.42                | 0.04                 | 0.04                 | 0.04                 | 0.03                 |
| Brandenburg Gate [17]           | 0.84                          | 0.84                | 0.87                 | 0.73                 | 0.72                 | 0.73                 | <b>0.71</b>          | 0.05                                      | 0.05                | 0.13                 | 0.14                 | 0.14                 | 0.19                 | 0.03                               | 0.03                | 0.09                 | 0.11                 | 0.12                 | 0.16                 |
| Church on Spilled Blood [17]    | 0.61                          | 0.61                | 0.61                 | 0.52                 | 0.52                 | 0.51                 | <b>0.50</b>          | .*                                        | .*                  | .*                   | .*                   | .*                   | .*                   | .*                                 | .*                  | .*                   | .*                   | .*                   | .*                   |
| Indoor [17]                     | 0.52                          | 0.55                | 0.53                 | 0.40                 | 0.40                 | 0.39                 | <b>0.38</b>          | 67.49                                     | 67.49               | 0.33                 | 0.33                 | 0.17                 | 0.13                 | 2.74                               | 2.74                | 0.06                 | 0.06                 | 0.02                 | 0.02                 |
| Radcliffe Camera [17]           | 0.64                          | 0.64                | 0.60                 | 0.58                 | 0.58                 | 0.57                 | <b>0.56</b>          | 0.09                                      | 0.09                | #                    | #                    | #                    | #                    | 0.02                               | 0.02                | #                    | #                    | #                    | #                    |
| Books [49]                      | 0.41                          | 0.41                | 0.41                 | <b>0.31</b>          | <b>0.31</b>          | <b>0.31</b>          | <b>0.31</b>          | .*                                        | .*                  | .*                   | .*                   | .*                   | .*                   | .*                                 | .*                  | .*                   | .*                   | .*                   | .*                   |
| Cereal [49]                     | 0.41                          | 0.41                | 0.41                 | 0.30                 | <b>0.27</b>          | <b>0.27</b>          | <b>0.27</b>          | .*                                        | .*                  | .*                   | .*                   | .*                   | .*                   | .*                                 | .*                  | .*                   | .*                   | .*                   | .*                   |
| Cup [49]                        | 0.61                          | 0.61                | 0.39                 | 0.42                 | 0.38                 | 0.37                 | <b>0.35</b>          | 71.42                                     | 71.42               | 66.01                | 72.54                | 1.22                 | 1.66                 | 3.51                               | 3.51                | 3.20                 | 3.59                 | 0.08                 | 0.07                 |
| Desk [49]                       | 0.49                          | 0.49                | 0.48                 | <b>0.40</b>          | <b>0.40</b>          | <b>0.40</b>          | <b>0.40</b>          | 0.02                                      | 0.02                | 0.18                 | 0.18                 | 0.18                 | 0.18                 | 0.01                               | 0.01                | 0.01                 | 0.01                 | 0.01                 | 0.01                 |
| Oats [49]                       | 0.40                          | 0.39                | 0.37                 | 0.25                 | 0.25                 | <b>0.24</b>          | <b>0.24</b>          | .*                                        | .*                  | .*                   | .*                   | .*                   | .*                   | .*                                 | .*                  | .*                   | .*                   | .*                   | .*                   |
| Street [49]                     | 0.50                          | 0.50                | 0.37                 | 0.35                 | 0.35                 | 0.33                 | <b>0.31</b>          | 0.27                                      | 0.27                | 0.27                 | 0.27                 | 0.15                 | #                    | 0.04                               | 0.04                | 0.02                 | 0.02                 | 0.01                 | #                    |
| Temple of Heaven [49]           | 0.65                          | 0.65                | <b>0.63</b>          | 0.65                 | 0.66                 | 0.67                 | 0.68                 | 1.30                                      | 1.27                | 1.04                 | 0.52                 | 0.62                 | 0.02                 | 0.07                               | 0.07                | 0.05                 | 0.02                 | 0.03                 | 0.01                 |

Table S9. Reprojection errors and camera motion differences (with camera motions from Doppelgangers [3] graphs  $\mathcal{G}_{Dopp}$  as reference) on **ambiguous** datasets. Camera translation difference is specified in the units obtained from the output of COLMAP [36] on the Doppelgangers graphs  $\mathcal{G}_{Dopp}$ . **Bold** values indicate least reprojection error in each dataset. The best value is checked only across disambiguated/disambiguated but oversplit reconstructions. ‘-’: Reconstruction not obtained. ‘-\*’: Doppelgangers reconstruction is not disambiguated and not used for camera motion comparison. ‘-#’: No common cameras reconstructed between Doppelgangers and our method due to different facades of the building being reconstructed by the graphs.

| Dataset                         | Reconstruction Time (mins) ( $t_R$ ) |                     |                      |                      |                      |                      |                      |
|---------------------------------|--------------------------------------|---------------------|----------------------|----------------------|----------------------|----------------------|----------------------|
|                                 | $\mathcal{G}$                        | $\mathcal{G}_{LCT}$ | $\mathcal{G}_{Dopp}$ | $\mathcal{G}_F(0.6)$ | $\mathcal{G}_F(0.7)$ | $\mathcal{G}_F(0.8)$ | $\mathcal{G}_F(0.9)$ |
| Louvre [46]                     | 95                                   | 90                  | 79                   | 42                   | 33                   | 30                   | 52                   |
| Notre Dame [46]                 | 1558                                 | 1686                | 1160                 | 1059                 | 1023                 | 736                  | 494                  |
| Sacre Coeur [46]                | 385                                  | 405                 | 347                  | 180                  | 159                  | 149                  | 156                  |
| Seville [46]                    | 203                                  | 113                 | 87                   | 24                   | 13                   | 13                   | -                    |
| Ellis Island [47]               | 212                                  | 195                 | 33                   | 26                   | 80                   | 27                   | 16                   |
| Piazza del Popolo [47]          | 178                                  | 184                 | 128                  | 99                   | 92                   | 30                   | 16                   |
| Yorkminster [47]                | 383                                  | 412                 | 113                  | 86                   | 82                   | 52                   | -                    |
|                                 | $\mathcal{G}$                        | $\mathcal{G}_{LCT}$ | $\mathcal{G}_{Dopp}$ | $\mathcal{G}_F(0.3)$ | $\mathcal{G}_F(0.4)$ | $\mathcal{G}_F(0.5)$ | $\mathcal{G}_F(0.6)$ |
| Alexander Nevsky Cathedral [17] | 32                                   | 28                  | 31                   | 13                   | 14                   | 13                   | 13                   |
| Arc de Triomphe [17]            | 22                                   | 18                  | 17                   | 15                   | 17                   | 11                   | 9                    |
| Berliner Dom [17]               | 142                                  | 118                 | 126                  | 104                  | 95                   | 96                   | 96                   |
| Big Ben [17]                    | 40                                   | 36                  | 43                   | 33                   | 33                   | 33                   | 30                   |
| Brandenburg Gate [17]           | 8                                    | 8                   | 9                    | 2                    | 2                    | 2                    | 2                    |
| Church on Spilled Blood [17]    | 18                                   | 18                  | 16                   | 5                    | 4                    | 4                    | 4                    |
| Indoor [17]                     | 9                                    | 8                   | 8                    | 1                    | 1                    | 1                    | 1                    |
| Radcliffe Camera [17]           | 18                                   | 18                  | 6                    | 6                    | 4                    | 3                    | 3                    |
| Books [49]                      | 0.3                                  | 0.3                 | 0.3                  | 0.1                  | 0.1                  | 0.1                  | 0.1                  |
| Cereal [49]                     | 0.5                                  | 0.5                 | 0.5                  | 0.1                  | 0.1                  | 0.1                  | 0.1                  |
| Cup [49]                        | 0.5                                  | 0.6                 | 0.3                  | 0.2                  | 0.2                  | 0.2                  | 0.2                  |
| Desk [49]                       | 1.0                                  | 1.1                 | 0.8                  | 0.2                  | 0.2                  | 0.2                  | 0.2                  |
| Oats [49]                       | 0.4                                  | 0.5                 | 0.4                  | 0.1                  | 0.1                  | 0.1                  | 0.1                  |
| Street [49]                     | 0.2                                  | 0.2                 | 0.1                  | 0.1                  | 0.1                  | 0.1                  | 0.1                  |
| Temple of Heaven [49]           | 78                                   | 76                  | 32                   | 54                   | 51                   | 49                   | 46                   |

Table S10. Reconstruction time using COLMAP [36] on **ambiguous** datasets. Applying our method removes false edges and sparsifies the viewgraphs leading to reduced reconstruction time.



| Dataset                         | Time Taken (sec)    |                     |                      |                      |                      |                      |                      |
|---------------------------------|---------------------|---------------------|----------------------|----------------------|----------------------|----------------------|----------------------|
|                                 | $\mathcal{G}_{Cui}$ | $\mathcal{G}_{Yan}$ | $\mathcal{G}_{Dopp}$ | $\mathcal{G}_F(0.6)$ | $\mathcal{G}_F(0.7)$ | $\mathcal{G}_F(0.8)$ | $\mathcal{G}_F(0.9)$ |
|                                 | [6]                 | [49]                | [3]                  | Ours                 |                      |                      |                      |
| Louvre [46]                     | 1261                | 259681              | 16009                | 48                   | 50                   | 50                   | 50                   |
| Notre Dame [46]                 | 10038               | -                   | 139065               | 5314                 | 5781                 | 4923                 | 4930                 |
| Sacre Coeur [46]                | 3154                | 253093              | 78242                | 1269                 | 1382                 | 1141                 | 1142                 |
| Seville [46]                    | 1057                | 42490               | 13479                | 22                   | 27                   | 22                   | 22                   |
| Ellis Island [47]               | 27385               | 1742                | 12450                | 34                   | 47                   | 41                   | 38                   |
| Piazza del Popolo [47]          | 356                 | 20370               | 8925                 | 13                   | 16                   | 16                   | 14                   |
| Yorkminster [47]                | 868                 | 82653               | 12748                | 19                   | 26                   | 23                   | 21                   |
|                                 | $\mathcal{G}_{Cui}$ | $\mathcal{G}_{Yan}$ | $\mathcal{G}_{Dopp}$ | $\mathcal{G}_F(0.3)$ | $\mathcal{G}_F(0.4)$ | $\mathcal{G}_F(0.5)$ | $\mathcal{G}_F(0.6)$ |
|                                 | [6]                 | [49]                | [3]                  | Ours                 |                      |                      |                      |
| Alexander Nevsky Cathedral [17] | 217                 | 174                 | 11203                | 96                   | 65                   | 65                   | 65                   |
| Arc de Triomphe [17]            | 141                 | 168                 | 7715                 | 15                   | 11                   | 11                   | 11                   |
| Berliner Dom [17]               | 1095                | 3161                | 31719                | 607                  | 428                  | 427                  | 430                  |
| Big Ben [17]                    | 164                 | 158                 | 9011                 | 31                   | 23                   | 23                   | 26                   |
| Brandenburg Gate [17]           | 67                  | 33                  | 3657                 | 11                   | 8                    | 8                    | 8                    |
| Church on Spilled Blood [17]    | 147                 | 98                  | 4360                 | 21                   | 16                   | 16                   | 16                   |
| Indoor [17]                     | 78                  | 48                  | 2535                 | 11                   | 8                    | 8                    | 8                    |
| Radcliffe Camera [17]           | 167                 | 106                 | 4381                 | 17                   | 13                   | 13                   | 13                   |
| Books [49]                      | 12                  | 6                   | 81                   | 1                    | 1                    | 1                    | 1                    |
| Cereal [49]                     | 13                  | 8                   | 104                  | 1                    | 1                    | 1                    | 1                    |
| Cup [49]                        | 37                  | 7                   | 706                  | 1                    | 1                    | 1                    | 1                    |
| Desk [49]                       | 16                  | 8                   | 167                  | 1                    | 1                    | 1                    | 1                    |
| Oats [49]                       | 12                  | 6                   | 100                  | 1                    | 1                    | 1                    | 1                    |
| Street [49]                     | 8                   | 6                   | 72                   | 1                    | 1                    | 1                    | 1                    |
| Temple of Heaven [49]           | 1144                | 211                 | 10790                | 35                   | 26                   | 26                   | 26                   |

Table S11. Time taken for different disambiguation methods on **ambiguous** datasets. Time taken consists of the time required for specific preprocessing for the algorithms and their filtering times. Our method takes significantly less time compared to other methods.

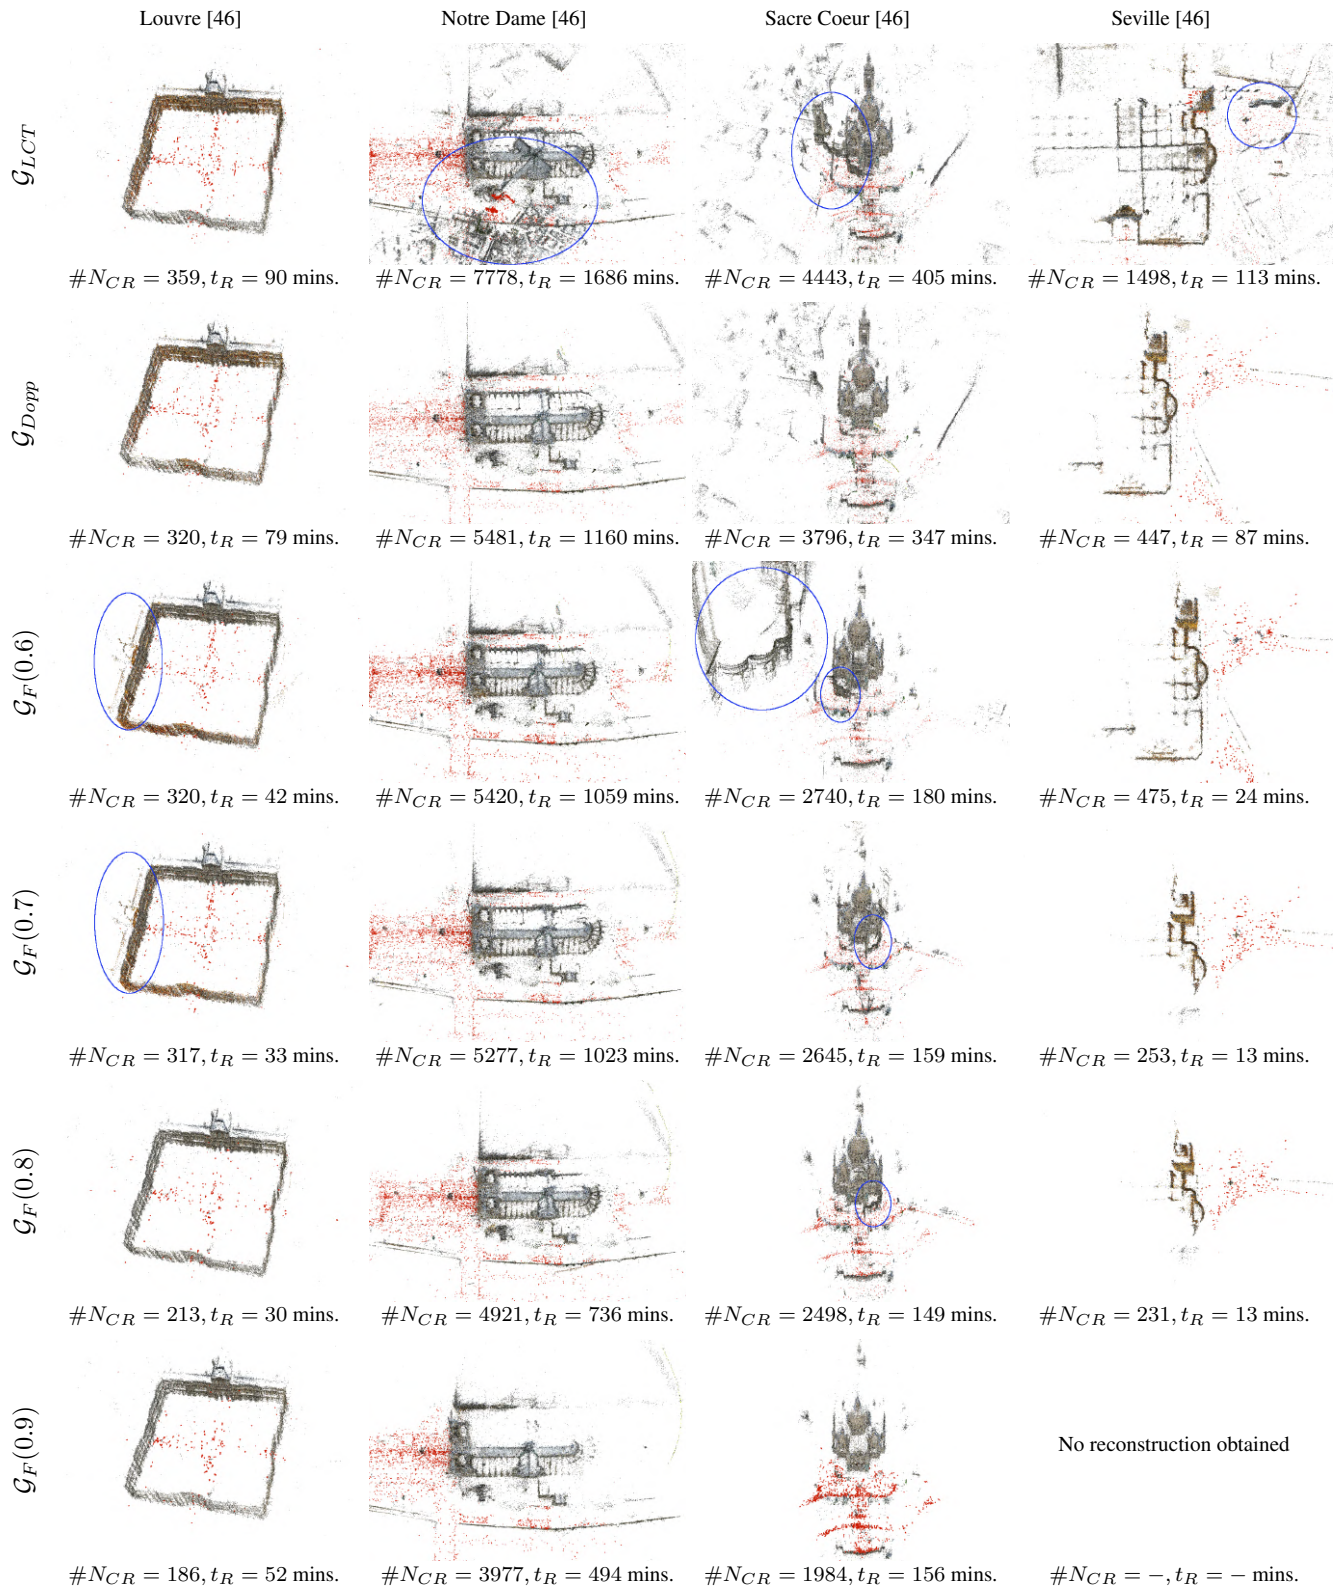

Figure S5. Reconstructions obtained with different graphs on **ambiguous** datasets from [46] where superimposed parts of the reconstructions are marked in blue. # $N_{CR}$ : Number of cameras reconstructed,  $t_R$ : Reconstruction time using COLMAP [36]. Recommended minimum edge score ( $m$ ) for large-scale datasets: 0.6 to 0.7; for highly ambiguous datasets, recommended  $m > 0.8$ .

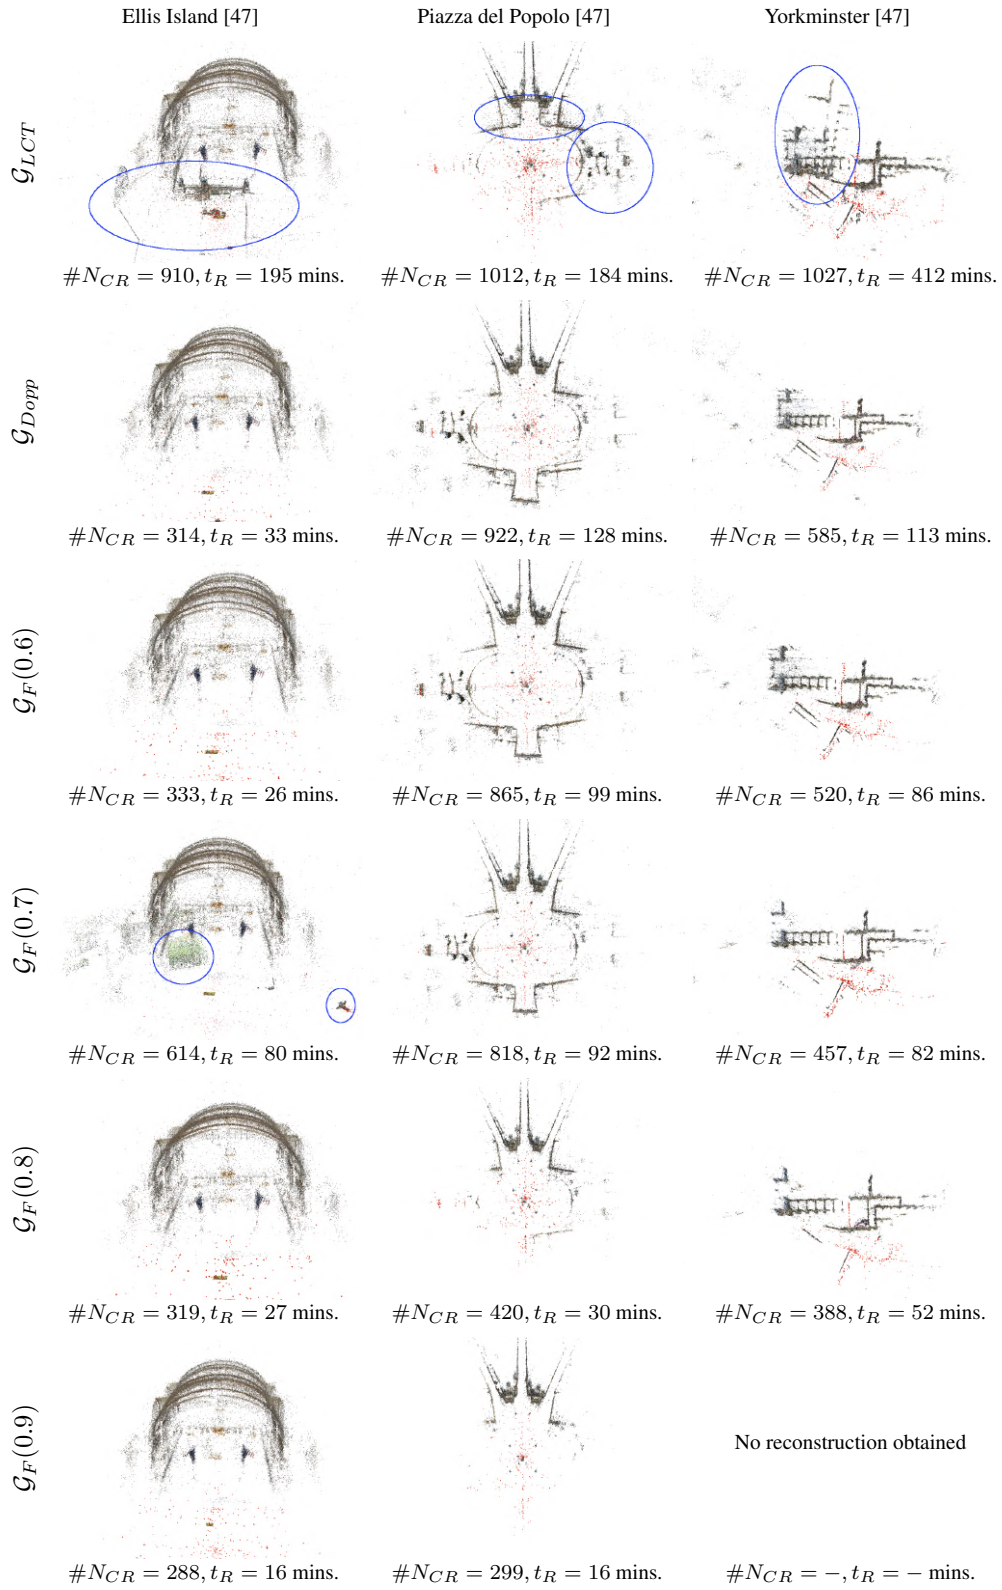

Figure S6. Reconstructions obtained with different graphs on **ambiguous** datasets from [47] where superimposed parts of the reconstructions are marked in blue. # $N_{CR}$ : Number of cameras reconstructed,  $t_R$ : Reconstruction time using COLMAP [36]. Recommended minimum edge score ( $m$ ) for large-scale datasets: 0.6 to 0.7.



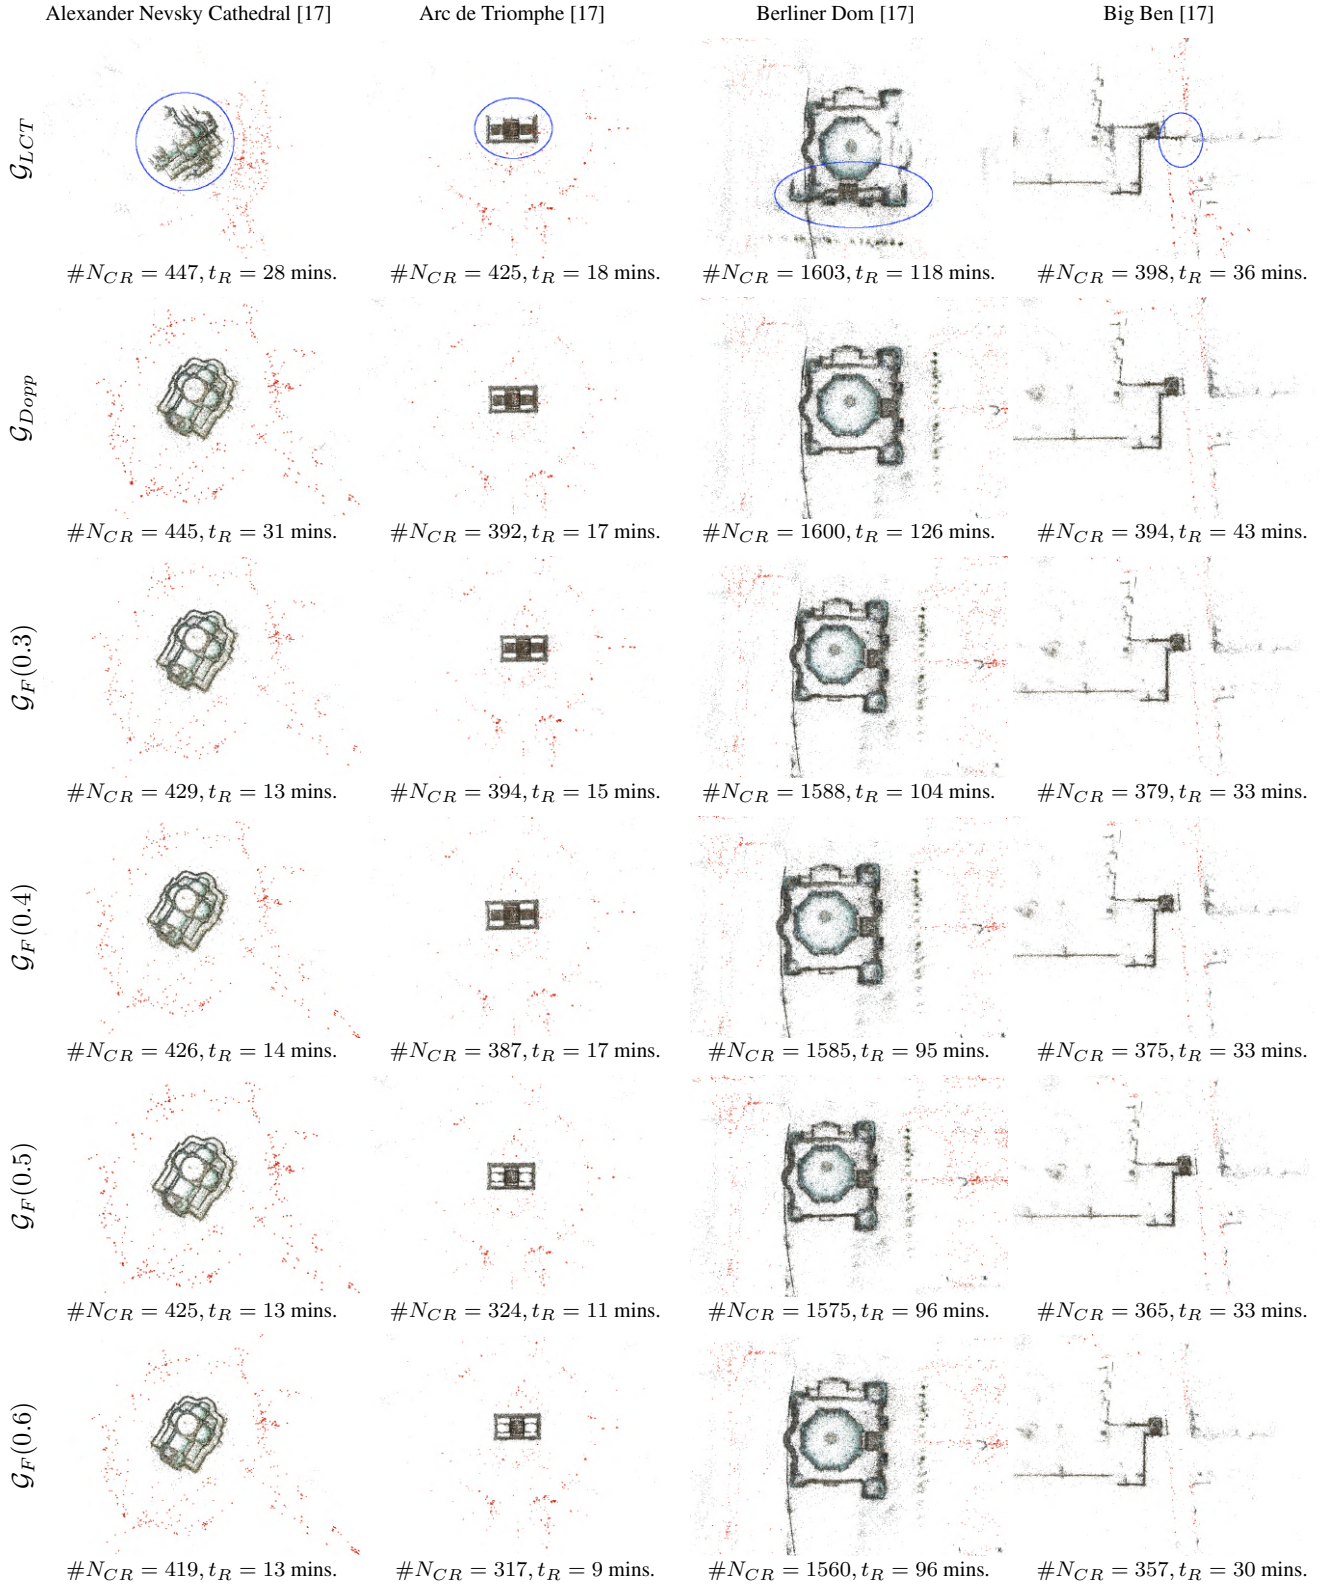

Figure S7. Reconstructions obtained with different graphs on **ambiguous** datasets from [17] where superimposed parts of the reconstructions are marked in blue.  $\#N_{CR}$ : Number of cameras reconstructed,  $t_R$ : Reconstruction time using COLMAP [36]. Recommended minimum edge score ( $m$ ) for medium-scale datasets: 0.3 to 0.4.

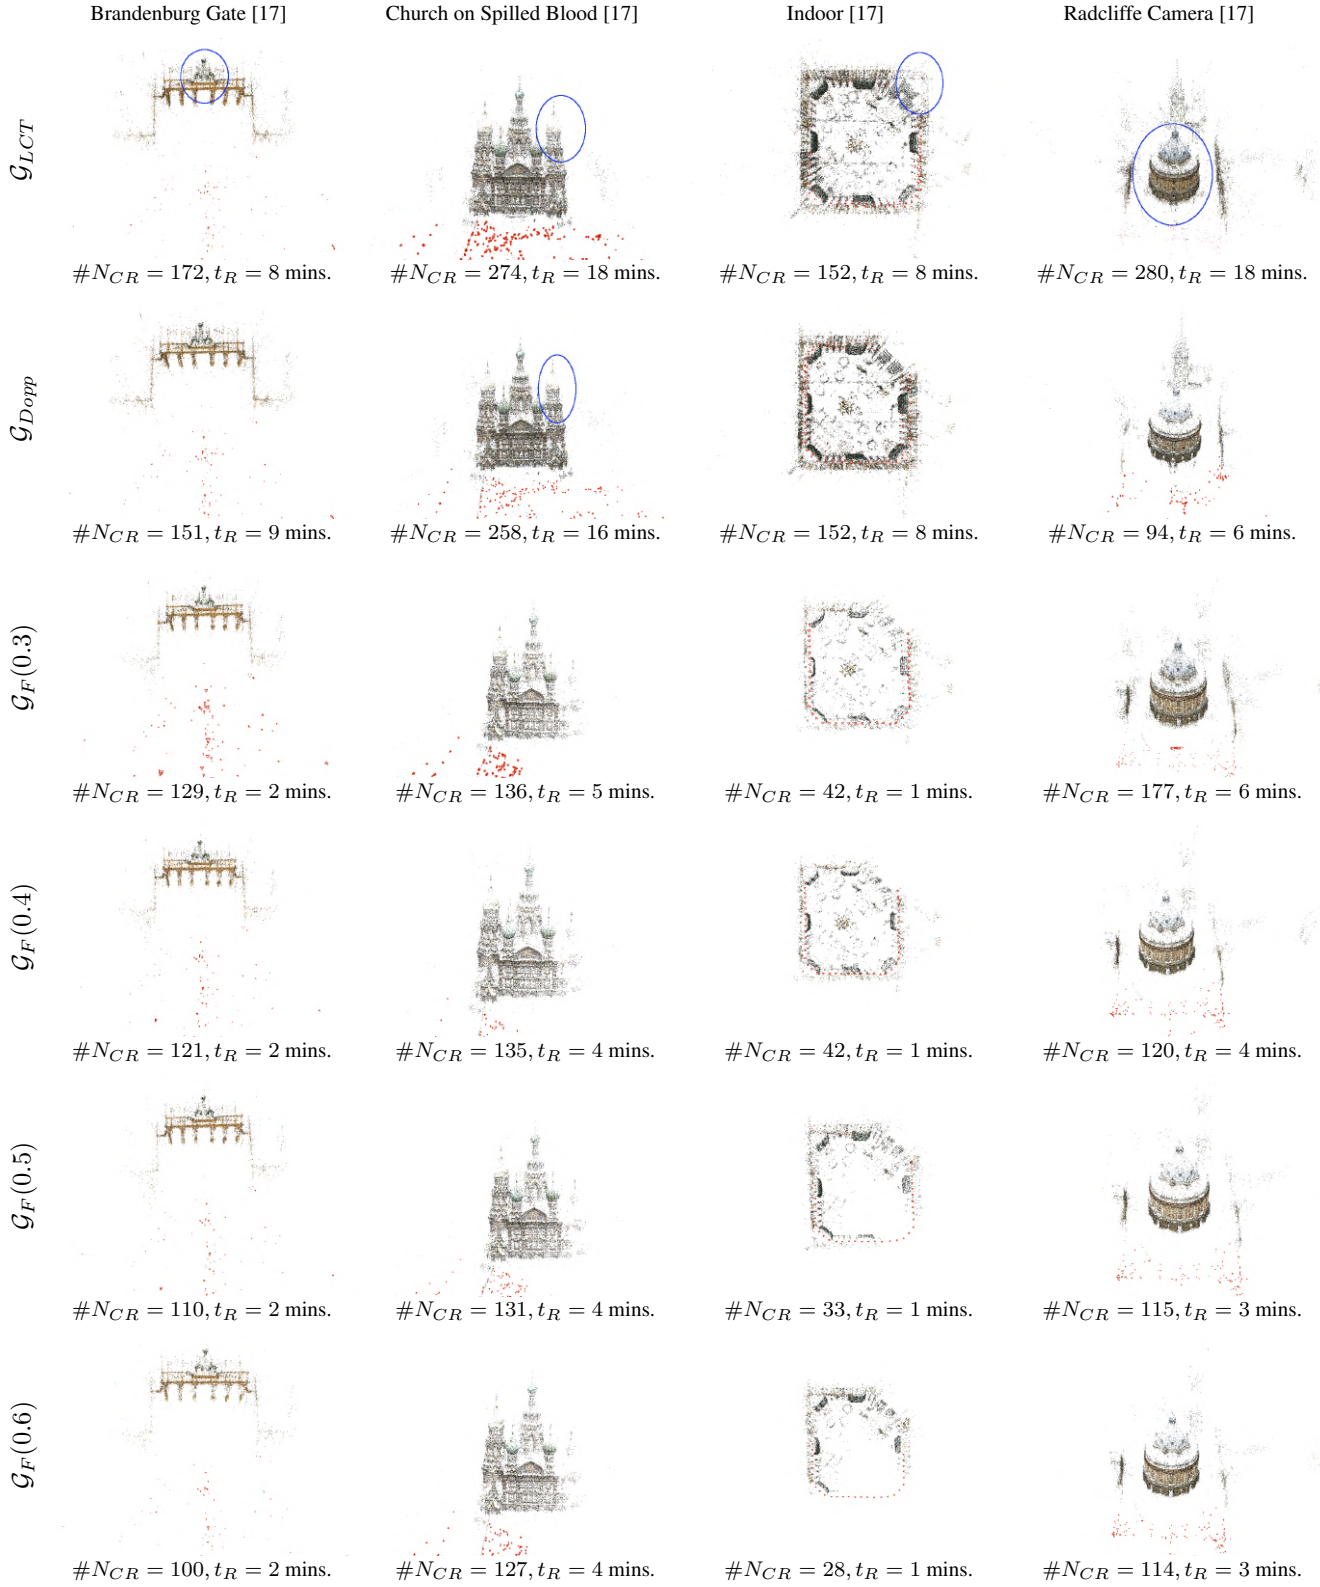

Figure S8. Reconstructions obtained with different graphs on **ambiguous** datasets from [17] where superimposed parts of the reconstructions are marked in blue. # $N_{CR}$ : Number of cameras reconstructed,  $t_R$ : Reconstruction time using COLMAP [36]. Recommended minimum edge score ( $m$ ) for medium-scale datasets: 0.3 to 0.4.

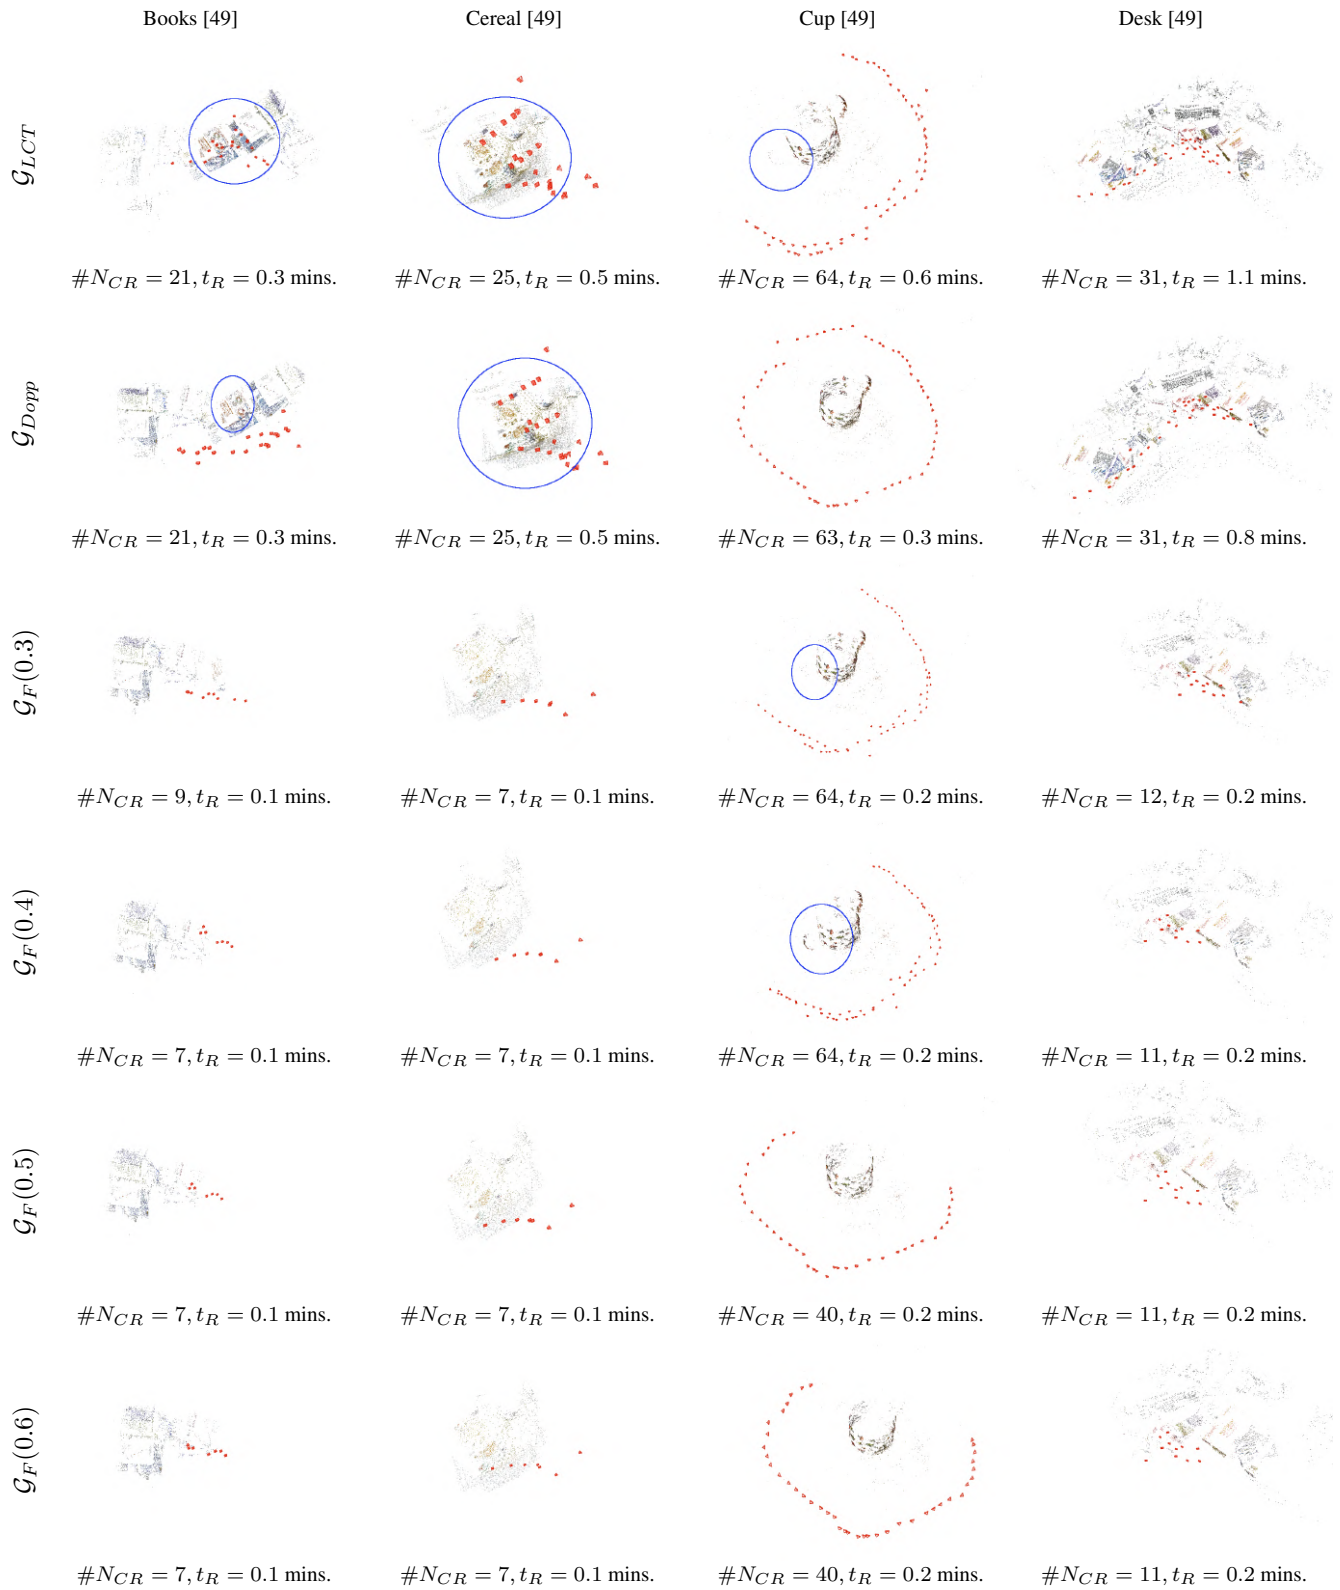

Figure S9. Reconstructions obtained with different graphs on **ambiguous** datasets from [49] where superimposed parts of the reconstructions are marked in blue.  $\#N_{CR}$ : Number of cameras reconstructed,  $t_R$ : Reconstruction time using COLMAP [36]. Recommended minimum edge score ( $m$ ) for small-scale datasets: 0.3 to 0.4.



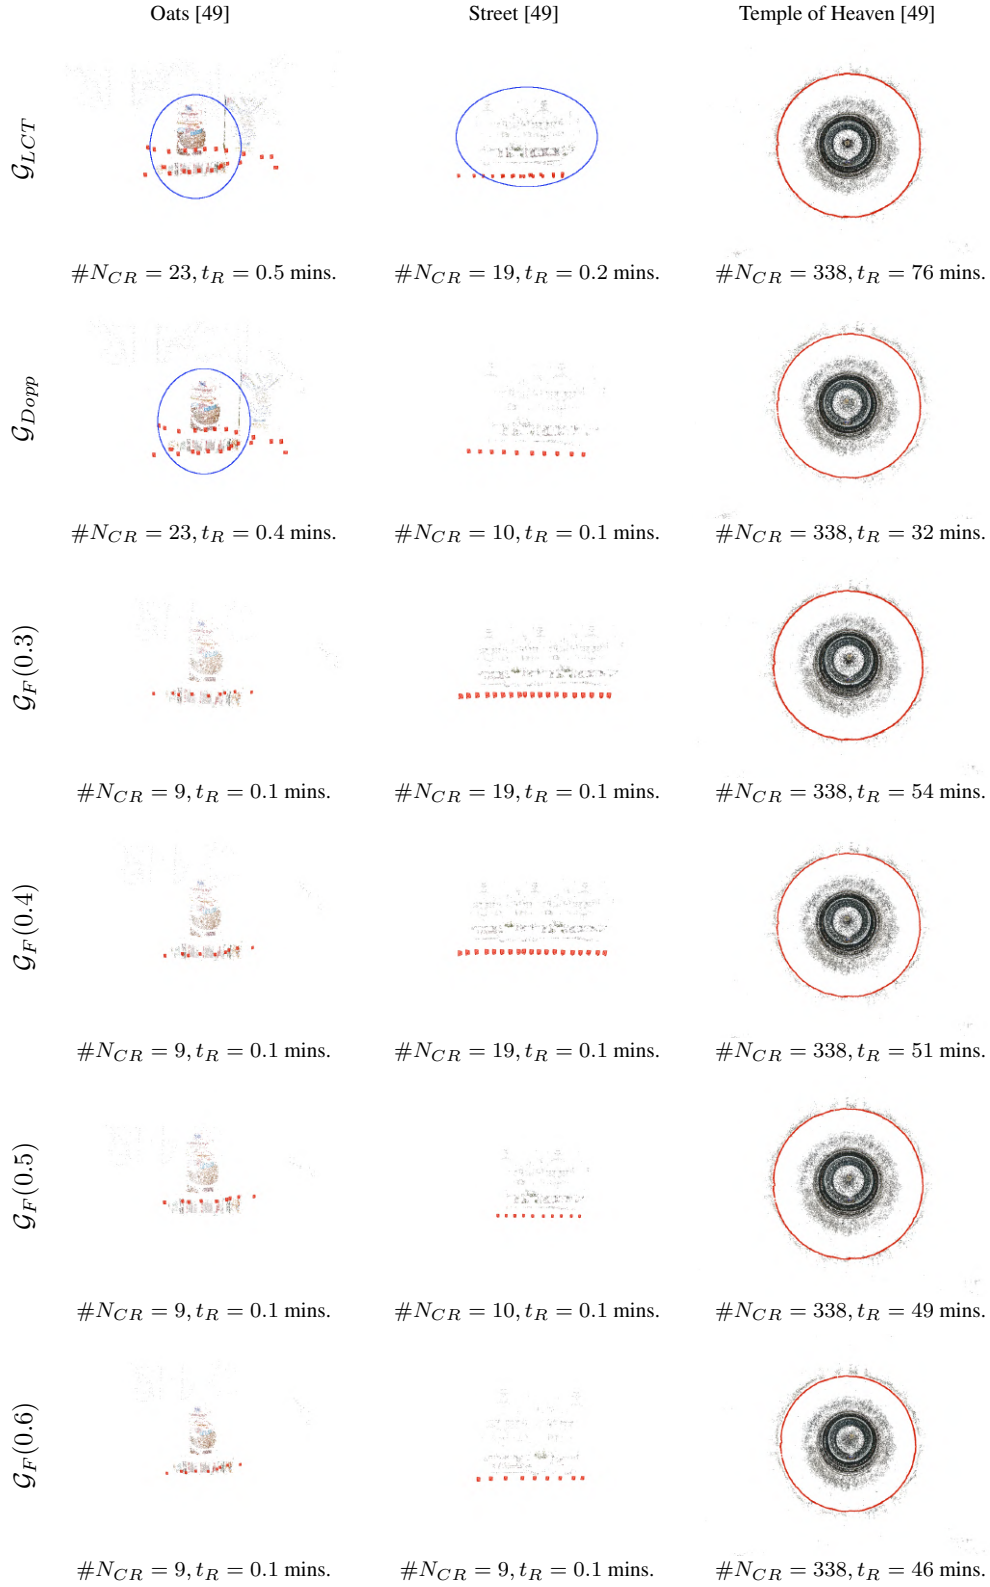

Figure S10. Reconstructions obtained with different graphs on **ambiguous** datasets from [49] where superimposed parts of the reconstructions are marked in blue.  $\#N_{CR}$ : Number of cameras reconstructed,  $t_R$ : Reconstruction time using COLMAP [36]. Recommended minimum edge score ( $m$ ) for small-scale datasets: 0.3 to 0.4.
